# Supplementary material for: Enhancing heatstroke prediction accuracy with interpretable machine learning: a multi-center data-driven approach
Source: PeerJ journal article supplement (doi:10.7717/peerj.20377), 2025-11-14
Supplement: raw_data.xlsx [file raw_data.xlsx]

## Sheet: train
id	gender(1=male,2=female)	age	coreteamp	HR	SPO2	MAP	WBC	HB	HCT	PLT	PT	INR	APTT	FIB	TT	DD	AST	ALT	TBIL	CR	CK	MB	Lac	diagnosis(1=non-heatstroke,2=heatstroke)
1	1	18	38.7	46	100	91.67	23.7952	92	30.1	199	12.4	0.99	29.6	1.41	13.6	0.21	15	27	10.8	59	185	113	1.2	1
2	1	20	41.7	46	96	90.33	6.43	118	35.5	217	11.9	0.99	29.8	2.07	14.1	0.03	17	11	8.6	58	100	50	1.2	1
3	1	56	38.7	46	99	99.67	11.4	113	34.1	181	11.2	0.95	28.5	1.98	12.1	0.18	12	17	13.8	58	35	87	0.8	1
4	1	30	39.6	46	99	100	6.67	146	43	141	14.1	1.11	40.8	1.76	16.9	0.19	14.8	16.2	33.31	85.7	121.4	36.2	1.1	1
5	1	19	37.5	46	100	100	14.26	96	32	220	14.5	1.15	45.2	2.23	14.6	0.11	23.8	21.3	34.94	64	89	32.7	1.2	1
6	1	19	37.8	46	99.2616	86.15	9.5	137	42.1	225	14.1	1.14	31.2	2.327	12.7	0.287	18.6	30.6	12.4	53.538	383.3	154.74	1.46612	1
7	1	19	37.9	46	99.7755	86.22	7.7	153	46.4	196	12.3	1.03	39.2	2.41	13.8	0.22	410.3	162.7	14.6	61	255.5	150.934	1.24245	1
8	1	20	37.9	47	98.7901	88.3	8.1	138	42.2	291	14.1	1.14	28	1.43	17.3	0.18	14.5	19.8	18.9	97.3	66.232	94.3419	1.42342	1
9	1	88	40.5	48	100	92.33	10.8	123	38.6	143	12.3	0.97	29.2	1.68	12.9	0.04	22	11	5	70	110	134	0.6	1
10	1	20	37.7	49	99.014	86.62	4.3	134	40.9	139	13.1	1.09	37.7	1.81	16.5	0.52	20	38.8	19.9	81.6	868.2	122.304	1.19442	1
11	1	19	38	50	99	87.33	8.77	140	42	222	13.4	1.04	38	1.87	17.9	0.35	19.8	11.6	10.44	68.4	164.1	26.4	1.1	1
12	1	20	38.5	50	97	107.33	5.7	131	38.5	129	12.4	0.86	25.8	2.13	13	0.5	18	14	9.7	65	69	42	0.6	1
13	1	34	39.6	52	98	71.67	9.42	140	40.3	186	12.2	0.8558	23.2	1.93	19.7	0.54	33.9	16.3	11.8	168	757.3	181.166	2.0095	1
14	1	48	42.2	52	100	90.67	6.72	120	35.5	99	11.5	1.08	32.5	2.19	13.1	0.46	13	19	8.4	74	65	133	1.34055	1
15	1	31	39.2	52	99	82.67	12.7	133	38.4	196	14.5	1.35	32.2	3.25	14.9	0.58	30	11	33.9	74	954	74.8	2.5	1
16	1	29	37.9	53	98	87	8.79	143	39	211	12.4	1.08	25.8	1.97	18.8	0.05	27	24	3.5	1.8	211	70.9	1.6	2
17	1	18	38.7	54	98.9276	71	9.2	143	41.8	198	13.9	1.06	62.376	2.18	17.4	0.22	30.53	30.27	18.4	100.4	514	246.7	0.6	1
18	1	22	39.4	54	98	77.33	10.4	131	36.5	142	13.9	1.02	62.376	3.38	12.2	0.08	12	7	12.4	73	47	44	0.5	1
19	1	67	43	54	98	88.33	5.59	152	45.3	202	13.5	1.18	28.8	2.59	17.8	0.26	25	23	3.35	1.8	112	37.1	0.7	2
20	1	23	41	54	97.9761	94.33	5.7	137	41.2	158	13.3	1.01	34	2.07	16.2	0.1	22.92	16.56	4.3	56.24	155	16.3	1.1	1
21	1	18	42	54	100	89.33	9.1	113	35.4	171	12.3	0.97	29.1	2.18	13.1	0.04	21	19	12.3	70	90	35	0.5	1
22	1	24	38.8	55	100	83.33	6.7	138	42.6	191	27.136	2.0904	27.2	1.2686	17.6	2.347	894.834	1387.64	56.398	205.104	7154.98	3332.54	0.643636	1
23	1	19	38.9	55	99	83.33	8.85	128	38.3	152	12.9	1.12	33.4	1.85	18.1	0.066	39	42	48.9	66	228	47.79	0.81671	2
24	1	19	38.9	55	99	83.33	9.68	141	42	234	12.5	1.09	29.3	2.44	19.2	0.031	21	16	5.764	78	484	90.46	1.3	2
25	1	22	38.9	55	99	83.33	7.98	142	42.8	201	13.2	1.15	37.7	1.83	19.7	0.052	29	28	31.5	70	530	41.82	1.93	2
26	1	18	36.9	55	100	97.33	5.16	140	43	211	13.1	1.01	33.9	2.74	16	0.25	34.1	16.8	15.54	84.1	469.9	91.3	1.1	1
27	1	21	39	55	98	101.67	7.03	155	45.8	161	12.3	1.07	29.8	1.85	17.5	0.27	100.3	39.7	17.5	81.5	4617.3	100.264	1.58206	1
28	1	22	38.6	56	100	82	6.2	126	37.9	144	14	1.3	38.5	2.62	17.3	0.88	22	17	18.5	85	53	42.71	0.7	2
29	1	19	41.3	56	99	90	7.92	146	43.1	242	12.4	1.05	33.2	1.83	17.5	1.05	25	19.6	24	16.8	721	91.3722	1.41819	1
30	1	24	38.6	56	97	83	12.3	97	30.3	236	12	1.14	34.2	2.64	12.9	0.08	24	19	12.5	47	130	107	0.4	1
31	1	18	38.5	56	100	92.67	9.75	127	38.2	176	10.216	0.8558	29.1	1.9	13.2	0.09	19	26	11	76	92	670	2.05849	1
32	1	20	37.6	56	99.3284	89.41	4.7	135	42	177	12.8	1.06	27.7	1.78	17	0.48	17	23.4	11.1	59.9	362.7	137.575	1.17019	1
33	1	22	40.7	57	99	87.33	3.75511	142	43	167	10.7	0.92	29.5	2.15	19.7	0.36	20.6094	13.8	10.7	81.2	222.9	21	0.905793	1
34	1	23	40.3	58	100	89.67	13.09	148	43.5	200	15	1.22	30.9	2.29	17	0.08	24	21	13.7	64	275	205	1.1	1
35	2	79	42.2	58	98	95.67	7.38	152	45.8	268	12.3	1.07	27.3	5.236	18	0.19	22	9	4.28	0.5	125	58.8	2.6	1
36	1	21	36.7	58	99	112	8.29	161	47.3	210	12.5	1.09	26.4	2.44	10.8409	0.19	47.4	14.6	6.7	86.6	1288.5	201.869	3.1	1
37	1	19	37.6	58	99.3301	88.6	7.3	145	43.9	177	14.4	1.19	25.6	1.44	18.4	0.5	830	665.2	12.2	75.4	146.4	156.456	1.29493	1
38	1	75	41	60	97	65.33	8.49	124	37.9	84	12.4	0.815511	23.4	2.89	12	1.14	13	1387.64	56.398	57	43	44	0.6	1
39	1	25	38.4	60	100	88.67	6.7	143	41.3	180	11.9	1.1	34.4	3.19	16.9	0.061	894.834	24	22.9	75	181	30.58	0.9	1
40	1	18	41	60	100	95.33	11.07	157	46.5	315	11.4	0.99	23.9	2.48	17.8	1.57	29	28	21.1	82.1	257.6	82.3488	1.5388	1
41	1	22	37.1	60	99.2275	86.06	8.7	137	36.4	58	19	1.57	55	2.86	16.3	2.34	332.1	862.7	11.3	146.5	1211.4	195.895	1.24796	1
42	1	24	37.5	60	99.4421	85.27	11.6	153	42.6	50	44.2	3.3	39	1.69	14.1	2.3	160.5	421.1	14.8	59.6	1261.3	222.91	1.39717	1
43	1	18	41	61	98	70.33	18.11	145	40.7	263	13.1	1.14	25.6	2.59	13.6	0.21	497	735	2.66	1.2	168	88.6	0.7	1
44	1	72	35	62	99	78.33	7.84	147	41.7	101	13.1	1.13	29.5	1.92	15.2	2	114.2	50.9	20.9	88.76	79.58	904.1	1.21809	2
45	1	21	38.2	62	100	81.33	8.98	146	43.9	170	14.4	1.25	32.7	3.44	16.2	0.47	19	43	13	82	413	250	1	2
46	1	21	39	62	99	80.67	8.4	125	35.8	165	14.1	0.98	29.3	3.01	12.6	0.07	16	16	7.4	75	132	144	1.3	1
47	1	21	36.9	62	100	93.33	4.94	123	36.4	207	13.3	1.16	30.8	1.78	17.4	0.28	40	31	2.74	2.1	876	40	1.5	1
48	1	18	39.8	62	99	86.67	9.37	169	52	123	11.2	0.98	18.7511	2.22	17.2	0.5	9.696	1307	29	92	22942.4	3386.95	0.7	1
49	1	20	40.5	62	98	93.33	11.5	136	41.7	182	11.1	0.93	27.8	1.47	12.8	0.05	16	18	8.9	75	84	80	1.07543	1
50	1	44	43	62	99	91.67	5.86	116	32.588	149	11.6	0.97	29.2	2.08	13	0.15	9.696	19	10.8	67	180	41	1.27265	1
51	1	21	37.5	62	98	81.67	11.21	173	50.8	188	11.8	1.03	27	2.86	17.4	0.14	29	24	4.36	1.5	119	140.8	1.7	1
52	1	23	38	62	90	87.67	12.4	75.1022	22.3511	31	12.1	0.87	26	0.512044	11.9	0.06	10	30	4.6	27	45	20	4.1	2
53	1	20	38.3	62	100	87.67	13.2	138	40.6	171	11.4	0.82	34	2.49	12.3	0.27	22	27	7.7	72	92	326	1.65678	1
54	1	23	39	64	98	79	6.62	142	41.9	205	12.8	1.09	25.4	1.94	19.2	0.1	32.1	16.1	34.2	85.5002	413	114	1.46151	1
55	1	22	40.5	64	99	86	3.75511	113	34.7	183	12.8	1.11	32.4	1.46	18.9	0.39	19.1174	20.4	5.8	70.5	178.521	21	1.0634	1
56	1	80	41.4	146.36	98	80.67	10.35	133	52.694	152	10.9	0.92	31	2.48	20.4	0.15	28.7	23.3	10.4	80.7493	336	11.5062	1.4	1
57	1	23	40	146.36	100	83.67	11.16	122	36.5	179	15.3	1.33	28.5	1.8	17.6	0.48	30	50	17	96	137	14	4.8	2
58	2	72	42	64	100	84	6.5	118	36.5	146	12.8	1.02	30.6	2.55	11.6	0.19	27	17	9	65	54	89	0.9	1
59	2	50	38	64	99	91.33	6.69	118	35.2	193	12.4	6.07956	27.1	2.55	10.8409	0.19	23.9	21.4	8.5	88.5	91.4	111.314	10.384	1
60	1	23	39.2	64	98	92	12.79	155	45.5	172	12.5	1.05	22.6	2.23	10.8409	0.26	35.1	19.6	5.7	113	267.5	118.518	10.384	1
61	1	18	42	64	98	86.67	24.2	133	40.2	207	11.8	0.815511	22	1.82	12.9	0.19	37	52	10.2	66	100	47	2.7	1
62	1	25	40.8	65	98	61.67	8.32	122	36.7	230	14.4	1.26	33.9	1.6	18.1	0.13	77	56	2.74	2.1	803	3332.54	1.2	1
63	1	21	38	65	98	89.33	8.2	154	47.3	192	11.7	1.02	23.5	1.95	17	0.34	21.3	16.4	31.5	100	11.7758	37.48	3.32	2
64	1	21	36.8	65	100	86	20.2	156	48	226	11.7	1.02	49.9	2.15	19	0.63	25.2	16.1	16.46	114.4	443.1	36.2	1.5	1
65	1	20	38.4	65	98	92	10.1	139	44.8	236	14.1	1.21	29.4	2.46	14.6	0.1	17.8	19.3	24.6	80.5457	143	15.9	1.47433	1
66	1	19	37.7	65	99.1167	84.67	12.9	137	43	152	13.3	1.07	41.6	2.23	26.4	0.3	12.4	14.6	23	68	420.6	152.669	1.49388	1
67	1	21	37.9	65	98.6472	86.73	18.3	134	40.9	175	12.9	1.07	24.4	1.42	17.7	0.14	23.9	20.5	15.7	107.4	149.9	123.366	2.52116	1
68	1	19	38.1	66	98	87.33	18.22	144	45.5	286	12.5	1.06	23.9	2.15	15.8	0.17	69.2	48.9	14.7	82.5425	1469	536	1.94719	1
69	1	50	40.3	66	98	79.33	4.38	131	39.4	252	13.1	1.12	37.2	3.35	16.8	0.1	16.9	11.7	29.1	77.7939	91	12	1.54282	1
70	2	55	42.5	66	96	89.67	8.11	120	34.6	211	13.5	1.21	30.7	2.03	15	0.129	23.3	15	18.1	67	294	50	0.35511	2
71	1	23	40.4	66	100	94	8.75	128	38.2	131	12.8	0.84	25.2	1.56	13	0.19	18	14	10.6	76	51	88	1.00611	1
72	1	23	37.8	67	100	78.33	10.29	140	41.3	194	14	1.16	28.8	3.64	22.1	0.02958	31	16	53.7	75	436	21	0.64	1
73	1	19	40.7	67	100	81.33	8.8	129	36.9	157	14.7	1.35	30.9	2.23	16.3	0.94	67	59	15.1	83	479	69.4	1.8	2
74	2	62	40.1	68	95	74.33	12.51	130	38.1	159	18	1.49	39	1.98	18.7	0.63	42	18	17.9	94	167	75	1.8	2
75	1	53	41	46	98	82.67	4.616	127	38.7	189	14.7	0.97	29.1	2.99	13.1	0.08	22	16	10.3	62	58	709	3.3	1
76	1	22	38.7	68	97	77.67	13.9	137	41.2	274	12.5	0.89	26.8	1.55	12.8	0.02	16	7.348	24.2	62	65	71	2.1	1
77	1	25	39.7	68	98	76.67	7.17	147	42.1	213	12.7	1.11	30.1	2.9	17.8	0.15	29	23	2.89	1.5	159	29.7	0.9	1
78	1	50	43	68	98	82.67	12.3	127	36.7	168	16.4	1.44	33.3	1.27	20.1	0.3	282	435	2.54756	4.8	219	44.3	1.5	1
79	1	20	40.4	68	90	85.67	7.48	133	39.9	273	11.6	1.07	32.4	2.64	15	3.02	27.6	29.9	10.4	85	627	188.7	1.3	1
80	1	29	41.2	68	100	89.33	7	127	39.1	146	12.4	0.86	25.9	2.61	12.3	0.15	16	13	8.5	69	56	39	0.983515	1
81	1	19	36.9	68	98	76.67	16.44	149	41.3	390.9	18.2	1.6	28.7	1.46	19.9	1.62	1789	2430	2.57	3.4	144	89.9	1.5	2
82	1	44	43	68	100	86	23.7952	157	47	200	10.7	0.93	28	1.75	22.8	0.09	25.8	18.6	8.59	72.3	187.7	63	1	1
83	1	26	37	68	99.2535	91	9.3	150	44.5	252	15.2	1.18	32.1	2.47	17.1	0.16	67.08	34.42	5.9	101	1882	131.1	1.39282	1
84	1	23	39.3	68	97	88	10.77	160	47.7	269	11.6	1.01	27.8	2.71	17.3	0.19	30.5	19	18.3	120.4	302.5	101.832	2.8	1
85	1	21	39.4	68	100	96	13.08	127	39.3	154	11.1	0.91	27.4	5.236	13	0.22	22	14	7.6	80	88	66	1.92552	1
86	1	22	37.3	68	98	99.67	8.28	139	42.6	63.06	12.1	1.05	31.5	1.75	17.8	7.48	19	18.6	5.5	72	198	220.46	1.95142	1
87	1	65	40.5	69	98	92	13.6	168	47.7	206	11.7	1.02	21.8	2.13	17.8	0.43	85	90	4.03	3.3	303	346.1	2	1
88	1	25	36.9	69	98	92	7.2	146	42.6	208	13.7	1.2	27.1	1.8	18.6	0.19	32	20	2.61	4.6	631	12.2584	1.5	1
89	1	67	41.3	70	98	64.67	12.7	147	42.1	233	13.7	1.07	30.4	2.45	16.2	0.35	23.3	9.8	19.67	106.4	217.1	186.3	1.4	1
90	1	22	41	70	99.2533	84.33	13.8	151	42.8	199	13.2	1	30	2.47	17.1	0.46	27.12	17.91	12.5	103.4	337	143.8	0.7	1
91	1	33	40.3	70	98	74	11.51	128	38.8	300	12.76	1.09	25.6	2.97	15.4	0.12	25.6	32.3	17.9	79.496	162	13.1	2.2	1
92	1	26	40	70	96	75.67	17.2	168	52.694	218	14.1	1.26	26.8	1.83	15.6	0.096	19.6	14.2	13.3	92	194	180	0.5	2
93	1	19	40.5	70	98	67	10	116	36.7	193	12.1	1.02	30.7	2.19	13.1	0.08	22	15	9.9	80	7154.98	71	1.3	1
94	1	24	37.8	70	100	76.67	14.5	164	49.2	100	14.7	1.37	37.8	2.82	16.4	0.68	58	27	17.6	136	882	584.5	1.8	1
95	1	23	41	70	97	79.33	20.85	141	41.1	318	11.4	0.99	24.6	2.51	17	0.39	43.5	54.7	4.62	93.6	391.4	569.3	1.9	1
96	1	27	40.2	70	98	84.33	14.1	104	35.7	346	13.4	1.17	22.3	2.4	16.2	2.87	53	37	2.82	4.4	116	58	4.3	1
97	1	28	37.8	70	98	86.67	11.8	141	40	199	14.6	1.21	32.6	2.2	17.4	0.29	14	16	23.4	65	128	50	1.7544	2
98	1	44	40.2	70	96	72.67	10.7	120	34.5	257	14.5	0.94	26.5	1.62	14.1	0.08	22	20	15.4	58	96	326	1	1
99	1	19	36.6	70	97	90	12.53	138	41.9	216	12.8	1.15	31.4	2.14	15.9	0.136	29.2	19.4	11.5	87	401	50	0.6	2
100	1	18	40.6	70	96	90	13.1	147	43.9	187	12.8	0.96	28.7	2.41	13.4	0.04	12	20	8.4	67	54	57	0.7	1
101	2	74	41	70	97	89.67	9.6	141	43.4	200	11.5	0.88	28.5	2.32	12.5	0.27	17	19	12.9	87	81	152	0.9	1
102	1	63	42	70	98	93	11.33	177	52.404	284	12.3	1.07	29.8	2.37	17.8	0.03	45	40	5.6	0.7	604	771.1	1.5	1
103	1	20	41.1	71	98	82.33	15.54	156	39.4	158	14.1	1.23	32.5	1.19	19.5	0.41	368	533	2.54756	3.3	879	506.8	1.2	2
104	1	24	43	71	97.5823	93.33	13.4	144	42.4	390.9	10.216	1.05	32.7	2.57	17.5	0.75	60.7	60.3	7.8	151.2	1127	865.5	2	2
105	2	58	41.3	71	98	104.33	13.59	155	44.4	207	11.9	1.04	25.9	2.4	17.6	0.43	33	40	4	0.5	66.232	76	0.6	1
106	1	20	37.7	72	98	80	16.61	132	38.3	166	13.21	1.15	31.6	2.05	23.852	1.01	569	609	2.54756	1.7	175	27.6	1.6	1
107	1	23	38.8	72	99	76	8.9	149	44	186	11.9	1.04	25.1	2.47	17.1	4.29	20.9	19.4	30.08	69.6	248.2	38.4	1.5	1
108	1	22	37.3	72	98	87.33	8.59	146	44.7	263	13.3	1.13	26.7	2.46	15	0.1	20	17.5	13	80.9721	102	98.1	2	1
109	1	26	41	72	96	81.67	8.31	158	43.7	228	11.1	1.03	24.5	3.68	12.1	12.34	20.2	24.5	4.8	82	195	101.7	3	2
110	1	27	39.4	72	100	89.33	7.34	136	41.1	137	11.3	0.85	25.5	2.92	11.9	0.2	11	13	9	83	42	47	0.4	1
111	1	21	40	72	99	86	13.09	147	43.5	273	12.4	1.08	26.8	4.4	15.8	0.22	16	14	2.72	33.9	119	19.5	0.5	1
112	1	23	39	72	98	85.33	13.43	152	44.7	176	13.3	1.13	29.4	5.22	17.7	0.2	20.2	19	37	87.9859	182	37.1	1.30474	1
113	1	19	39.7	72	100	86	9.61	130	39	218	14.8	1.18	36.3	2.51	16.4	0.55	30.1	22.9	9.01	98.6	156.8	89.4	1.3	1
114	1	21	37.2	72	98	83.67	8.7	150	42.5	186	14.2	1.12	33.5	1.56	13	0.01	18	18	7	64	65	642	3	1
115	1	67	41	72	98	98.67	10.4	127	38.3	157	11.3	1.39	41.8	2.18	12.8	0.02958	15	13	9.1	67	50	23	1.6	1
116	1	43	44	73	99	80	15.32	133	40.2	156	11.7	1.01	29.6	3.92	12.816	0.62	88.4	29.5	13.47	146.1	11.7758	413.3	1.96299	2
117	1	19	38.4	73	99	86	9.3	135	39.9	141	13.1	1.22	32.9	3.26	16.1	1	48	16	23.7	90	1865	587.2	2.3	1
118	1	30	38	73	100	92	4.38	128	37.8	188	13.3	1.24	33.5	2.76	14.5	0.313	700	566	12.8	72	1118	268.2	1.7	2
119	1	19	38.5	74	98	77.33	15.08	140	38.9	150	14	1.22	25	1.82	18	0.61	27	7.348	3.21	1.7	120.3	226.3	4.4	1
120	2	76	39	74	93	83.33	14.96	119	35.3	161	13.3	1	29.9	2.08	12.6	0.27	10	7	10	60	81	49	1.5	1
121	1	20	38.3	75	98	72.67	7.1	134	38.7	196	13.5	1.26	35.2	4.12	15.3	1.58	35	21	19.5	84	1017	301	1.3	1
122	1	22	37.7	75	98	72	5.33	148	29	287	11.6	1.07	23.1	2.28	14.6	17.76	26.2	40.7	12.2	130	244	266.3	3	2
123	2	88	41.5	75	100	82	5.26	140	43	235	11.1	0.96	27	2.44	19.8	0.63	36.5	32.3	5.97	74.2	256.2	236.3	1.2	1
124	1	20	37.2	75	100	98.33	7.98	147	41.9	257	11.9	1.03	22	2.32	17.3	0.085	24	20	14.8	100	180	45.13	1.63351	2
125	1	21	36.9	75	99	91.33	10.31	132	41	243	13.7	1.07	34.6	3.01	15.6	0.31	40.8	36.6	44.81	80.8	800.9	24.9	1.2	1
126	1	20	39.6	75	99	95	12.14	158	32.588	166	13.4	1.17	29.9	1.79	18.3	0.086	47	17	34.6	131	1672	1037	1.45568	1
127	1	22	42	76	98	88.33	8.3	113	35.6	168	13.2	1.22	36.7	1.85	13.4	0.3	12	7	7.9	54	30	21	0.8	1
128	1	24	37.3	76	79.466	88.33	13.7	127	39.1	199	12	0.92	27.7	2.33	11.9	0.12	19	15	9.5	39	48	172	0.9	1
129	2	73	42	76	96	82	18.2	134	39.3	120	12.3	2.0904	31.3	2	13.1	0.05	15	22	10.8	64	82	707	1.27249	1
130	1	24	38.1	76	100	76.33	7.1	131	40.4	81	18.8	1.76	36.7	2.8	15.3	0.359	301	336	27.8	110	1191	90.5	0.9	2
131	1	18	39.5	76	100	89.33	6.53	149	45	282	14.1	1.11	39.4	1.97	12.816	0.16	20.5	15.8	41.8	81.3	120	28.9	1.2	1
132	1	24	38.4	76	99	87.33	9.9	133	38.5	175	12.3	1.14	32.8	3.81	15.1	5	42	34	14.8	57	1496	308.4	2.3	1
133	1	20	39.5	76	100	90.67	13.33	137	40.3	126	15.2	1.26	34.2	2.75	22.8	0.08	29	21	24	111	523	254	1.2	1
134	1	21	36.8	76	99	94.67	4.85	145	43.3	176	12.2	1.06	31.8	1.78	19.6	0.01	41.1	47.6	12.03	56.7	3246.1	171	1.2	1
135	1	22	39.7	76	97	90	7.6	139	45	173	11.1	0.815511	24.2	2.41	13	0.34	22	20	10.2	73	106	48	0.5	1
136	1	21	37.8	76	100	87	3.8	147	42.5	186	10.7	0.93	23.8	2.56	14.8	0.1	29	26	18.6	64	575	139.67	1.20106	2
137	1	39	43	76	98	98.67	4.616	145	40.2	198	11.4	0.99	28.5	2.26	18.8	0.49	422.7	128.2	32.28	85.1	22942.4	1200	2.1	1
138	1	22	37.5	76	98	94.33	16.4	133	36.2	150	14	1.08	32.3	1.67	12.7	0.03	12	12	15	70	33	90	2.5	1
139	1	23	37.8	76	100	110	7.9	134	39.5	145	11.5	1.07	31.7	3.22	13.9	0.59	30	36	13.3	68	144	21.28	1.2	2
140	1	21	38.1	77	98	79.67	15.16	140	42	214	16.3	1.34	42.1	2.6	18	0.95	63	46	10.4	134	2129	3000	3.6	2
141	1	47	36.9	77	99.126	89	8.3	145	42.7	252	14.6	1.12	39.3	2.35	18.1	0.39	25.81	18.22	12.4	5.96	351	53.7	0.5	2
142	1	21	37.8	77	100	79.33	19.3	158	46.6	257	11.7	1.09	25.2	2.73	15.3	0.077	57	41	8.2	142	159	183.2	5.9	2
143	1	23	38.3	77	98	75	9.31	147	42.5	151	13.2	1.15	25.5	1.74	18	0.16	29	30	3.99	0.5	134	26.9	0.8	1
144	1	27	38.5	77	100	87.67	9.45	139	41.5	150	14.3	1.24	22.8	2.28	18	0.48	13	19	5.764	81	145	46	2	2
145	1	24	39.5	78	99	80.33	7.71	147	45.9	63.06	27.136	0.99	21	1.2686	23.852	0.333	34	19	8.2	205.104	570	305.3	2.45878	1
146	1	19	38.5	78	100	77.33	7.53	138	41.6	269	14.1	1.11	32.1	2.61	15.4	0.88	27.8	32	14.51	77.7	649.9	737.4	1.3	1
147	1	24	41.4	78	98	76.33	4.55	153	46.9	140	11.2	0.95	31.1	2.76	19.6	0.1	41.3	47.7	14.4	80.5336	110	396.375	1.51522	2
148	1	52	40.4	78	100	63.33	16.35	126	39.1	168	13.6	0.97	29.1	2.77	13.3	0.09	29	15	16.5	53.538	127	41	1.53314	1
149	1	19	38.3	78	99	81	17.05	137	36.7	168	11.2	0.97	29.1	2.34	18.2	0.11	40.6	38	18.58	93.6	233.5	12.2584	1.3	1
150	1	73	38.5	78	100	97.33	8.26	145	45	352.285	14.4	1.14	38	4.37	16.2	0.36	25.5	15.6	16.1	85.4	434.9	78.4	1.9	1
151	1	19	39	78	100	94.67	8.3	127	37.9	160	11.4	1.08	33	2.4	12	0.06	18	14	10.5	65	42	37	0.6	1
152	1	47	40.3	78	79.466	87.33	8.64	113	32.5	90	10.9	0.91	27.4	1.5	13.2	0.14	31	45	8.6	52	59	1044	1.28603	1
153	1	45	41.5	78	100	97	7	120	37.4	201	12.3	1.14	34.1	3.24	13.2	0.25	23	13	7.7	73	38	98	1.6	1
154	1	18	39.2	78	98.5278	107.67	19.1	153	44.4	166	18.1	1.5	38.3	1.59	17.4	0.65	43.11	16.39	8.8	98.5	860	890.2	1.1	2
155	1	65	40.1	79	100	94.33	8.63	149	42.5	167	12.3	1.08	18.7511	3.93	15.6	0.23	22.5	22.3	11.6	89.3	15	57	1.23	1
156	1	22	39.6	79	98	93	9.25	75.1022	40.5	227	12.7	1.11	31.9	2.39	17.6	0.34	4233	35.6	31.5	101.8	48.9	53.8	2.05	2
157	2	67	39	80	100	61	9.54	136	40.2	177	12.8	0.85	25.6	1.77	12.6	0.05	20	49	10.1	62	83	252	1.38133	1
158	1	21	37.5	80	98.8404	80	8.2	143	40.8	209	14.3	1.11	39.5	2.95	16.5	0.1	26.36	16.14	8	75.9	304	48.9	0.7	1
159	1	20	37.1	80	100	75.33	8.65	165	48	203	14.3	1.13	29.8	2.16	16.7	0.38	76.1	43	39.75	120.9	159.5	109.2	1.5	1
160	2	82	43	80	96.3561	84	23.7952	145	42.8	202	14.9	1.15	30.2	2.11	17.7	0.14	32.17	21.4	10.2	114.69	576	538.6	4.2	2
161	1	21	38.5	80	97.9184	90	17.6	156	46.1	221	14.1	1.08	31.8	2.65	18.8	0.72	34.88	18.8	15.9	113	270	503.8	1	2
162	1	18	40	80	100	89.33	9.11	136	39.5	177	17.8	1.47	34.5	3.27	13.7	0.19	33	22	12.2	79	202	32	0.8	1
163	1	18	41	80	100	86.67	5.37	165	46.9	154	12.9	1.12	32.9	1.48	20.3	0.19	21.7	17.2	23.3	87.5	196.7	114.563	1.37474	1
164	1	21	39.5	80	95	86	11.4	162	48	236	11.9	1.04	18.7511	3.78	25.2	0.8	767	217	17.6	99	1997	3386.95	1.3	2
165	1	28	38.2	80	95	84.33	21.8	163	46.4	261	14.9	1.05	31.5	3.32	15.3	0.52	38	43	45.5	53.538	1204	309	2	1
166	1	62	38.5	80	99	97	8.3	139	41.5	182	13.1	0.85	33.2	2.44	12.8	0.01	14	15	16.1	70	61	25	0.8	1
167	1	41	43	80	99	91.67	6.66	145	41.9	276	10.7	0.89	25.3	2.78	16.7	0.12	103.6	52.7	13.1	58.1	66.232	402.1	1.6	1
168	1	19	39.7	80	98	100.67	8.12	125	38.3	245	13.4	1.17	29.7	2.71	17.7	0.82	24.3	22	20.7	93.4	252	142.212	1.44579	2
169	1	19	38.6	80	95	95.67	14.2	118	34.1	122	14.4	0.88	26.4	1.65	13.1	0.7	34	66	13.9	77	51	266	1.8	1
170	1	22	37.9	80	100	107.33	10.49	151	43	214	11.2	0.93	29	2.32	19.8	0.08	19	13	5.7	77	147	271	1.2	1
171	1	23	38.3	80	100	98.67	7.36	131	38.8	122	12.1	1.05	29.9	2.99	15.8	2.99	317	618	22.4	232	209	76.37	1.31924	2
172	1	18	39.7	80	99	94.33	11.12	133	41.3	256	12	0.8558	27.1	2.17	18.2	0.19	34.3	21.2	11.8	85.2	22.2	154.19	3.61	1
173	1	21	40.8	80	97	112	10.83	157	45.7	216	12.7	1.11	32.5	2.5	18.2	0.19	32.1	14.5	9.6	90.5	68.6	43.17	0.79	2
174	1	21	36.8	80	100	109.67	14.15	135	41.6	206	12.3	0.98	29.5	1.81	12.4	0.2	16	17	8.6	69	71	478	1.9	1
175	1	20	37	80	99.0091	87.82	10.8	113	31.1	253	16.9	1.4	28.5	2.51	14.8	1.16	9.5511	28.7	17.4	83.5	597	190.239	2.12032	1
176	1	24	37.3	80	98.8543	92.27	13.2	132	40.1	285	12.1	1.01	62.376	2.19	16.2	0.16	37.8	20.3	5	76.1	198.3	253.871	2.30718	1
177	1	23	37.7	80	98.8389	84.66	8.4	121	37.7	153	10.7	0.82	62.376	4.17	13.6	3.71	67.1	300.4	15.6	230.2	12119.7	196.628	1.38523	1
178	1	23	37.8	81	98	76.67	8.57	172	49.3	186	11.7	1.02	21.5	2.05	18.1	0.96	41	26	3.88	0.5	184	385.2	1.3	2
179	1	24	38	81	98	92.33	19.1	159	45.7	196	12.3	1.07	24.2	2.4	18.3	19.01	35	73	3.93	1.7	134	104.8	1.5	2
180	1	34	40.7	82	95	94	8.59	120	33.7	220	11.2	1.04	29.4	2.51	16.9	4.12	73.9	111.4	7.1	103.2	3926	532	1.6	2
181	1	23	38.5	82	99	80.33	5.38	143	45	216	27.136	2.0904	31.2	1.2686	17.7	0.743	894.834	1387.64	56.398	205.104	7154.98	3332.54	1.36112	1
182	1	20	39.6	82	98	91.33	15.42	161	47.2	292	12.7	1.11	25.6	2.07	17.4	0.39	22	30.7	29.7	108.9	26.7	108.53	3.46	2
183	1	64	38	82	98	91.67	7.86	158	45.9	216	11.7	1.02	26.6	3.04	17.4	0.27	27.9	14.2	5.764	110.7	219	97.5973	2.4	1
184	1	23	37.6	82	98.4699	87.37	18.6	163	46.5	208	13.6	1.13	23.6	1.34	17.4	0.11	22.6	23.9	7.7	106.8	157.6	260.647	2.18921	1
185	1	19	36.9	83	100	82.67	7.48	143	42.2	203	12.3	1.07	30	2.22	18	0.19	71.2	21.2	17.5	87.9	39.6	291.86	2.18	1
186	1	22	40	83	99	95.67	4.9	141	39.8	141	13	1.21	30.3	3.47	15.9	17	27	20	17.5	79	605	160.8	0.8	1
187	2	84	36.2	84	99	84.67	9.84	156	47.1	182	14.6	1.27	26.7	2.28	18	1.26	41	34	11.6	120.8	214	107.5	1.3	2
188	1	44	41.5	84	99	76.33	7.34	128	39.4	209	12.6	1.09	28.9	1.48	19.8	0.25	50.3072	20.3	16	103.7	11.7758	44.87	2.17302	2
189	1	45	40	84	97	86.33	6.3	164	47	258	12.4	1.11	30	6.47182	14.8	0.14	16	12	25.4	104	1653	169.3	2.9	2
190	1	20	40.1	84	99	79.67	9.88	154	46.3	256	10.216	0.8558	25.9	2.54	18.2	1.17	52.3	35.4	10.7	97.8	45.7	337.54	7.32	1
191	1	21	40.3	84	97	97.67	9.84	115	33.9	119	20.8	1.85	30.4	1.39	23.5	0.039	29.9	18	32	80	567	112	0.6	2
192	1	19	38.1	84	97	94	7.62	129	38.6	193	13.2	0.95	28.5	2.79	12.4	0.15	13	14	6.9	71	54	61	1.3	1
193	1	20	38.4	84	100	99.33	20.25	126	38.6	151	13.4	1.09	32.6	2.35	11.8	0.02	9.5511	8	6	70	62	11.5062	2.16304	1
194	1	23	37.7	85	98.8359	69	10.5	134	41.6	224	14	1.08	33.9	5.236	16.7	0.37	43.47	31.07	5.8	92.56	443	323.5	4.8	1
195	1	23	40	85	98	80	8.45	148	43.2	170	12	1.04	27.1	2.16	18.1	0.03	35	22	2.89	2.7	728	64.8	1.2	1
196	1	77	39.3	85	95	77	12.27	163	45	101	18	1.7	25	1.5	40	2.64	52	55	20	101	245	100	2.5	1
197	1	21	39.7	85	100	96	7.58	128	37.7	302	14.9	1.16	43.1	2.52	17.7	0.737	34	1387.64	56.398	76	1352	331	0.7	1
198	1	21	37	85	99.04	89.49	21.8	119	35.9	122	14.9	1.24	30.1	2.26	16.2	0.84	894.834	29.1	37.2	60.5	276	67.3063	1.26719	1
199	1	19	37.7	85	98.8876	83.94	3.75511	134	40.4	219	14.7	1.21	27.6	3.34	17.2	1.65468	13.3	20	14.8	89.6	57.7	228.364	1.41468	1
200	1	64	38.8	86	99	64	14.48	147	43.9	175	13.4	1.16	23.7	1.69	19.2	0.45	37	30	9.8	136.2	479	472	4.1	2
201	1	23	37.6	86	98	83.33	11.6	143	42.1	114	14.1	1.21	32.1	3.58	13.8	0.17	19.4	14.7	15.3	85.1924	90	11.5062	1.40128	2
202	1	70	37.7	86	99	87.33	5.44	166	48.5	164	11	1.12	33.4	2.07	10.8409	0.16	212.9	386.2	20.2	71.6	219.2	109.14	1.34698	1
203	1	64	42.5	86	98	84.33	6.67	152	45.3	177	13.6	1.16	31.9	2.22	16.2	0.1	22.9	22.3	20.2	87.7427	150	19.3	1.51616	1
204	2	45	40.6	86	100	97.33	11.09	151	45.6	241	12.7	1.1	30.7	1.68	18.3	0.2	28.8	20.9	21.9	100.9	763.1	191.621	1.25738	1
205	1	73	38.5	86	98	81	13.38	124	36.9	222	14	1.22	27.6	1.61	16.2	0.58	53	25	2.66	9.4	1600	292.6	1.5	2
206	1	22	40	86	96	107.67	10.22	137	40.9	322	11.4	1.05	31.7	2.56	14.9	4.62	12.8	21.1	18	84	212	49.6	1.3	1
207	1	65	43	86	98	94	8.58	135	39.5	352.285	11.4	1.05	31.2	2.54	16.3	6.82	9.696	22.9	11.9	71	263	47	0.7	1
208	1	22	37.8	86	99.0886	88.51	12.9	140	43.9	207	17.6	1.42	38.1	1.92	17.4	0.34	69.2	145.9	42.3	130	709	64.6891	1.21055	1
209	1	22	37.8	87	98	88.67	19.77	116	32.588	219	12.9	1.12	23.4	1.91	18	0.62	9.696	60	8.9	157.7	2203	2099	2.3	2
210	1	21	38.5	87	99	86.33	5.84	122	36.8	145	12.4	1.07	32.5	1.47	19.3	0.35	83.9992	21.8	25.4	79.2	11.7758	27.37	1.23109	2
211	1	19	40	88	97.9294	98.67	12.7	158	48.4	209	13	0.98	26.5	2.47	16.8	1.89	65.54	51.77	5.8	97.31	273	111.2	2.5	2
212	1	24	39.6	88	98	100.33	10.5	141	42.4	229	12.4	0.88	26.5	1.52	13.5	0.11	17	14	16.8	64	73	76	2.11257	1
213	1	19	37.8	88	98	90	15.2	132	37.7	181	11.7	0.98	29	2.32	17.2	0.33	24	14	43	63	387	205	1.2089	2
214	1	20	36	88	99.0008	84.17	19.2	128	37.7	25	20.7	1.67	36	4.533	18.6	3.87	44.6	83.6	27.6	92.9	2216	101.622	1.39079	1
215	1	24	39.3	146.36	98.7119	91.72	8.7	116	52.694	59	17.8	1.47	120	1.48	22.3	1.93	162.3	324.1	14.9	102	3668.4	154.359	1.36629	1
216	1	58	41.2	146.36	98.159	85.33	5.9	145	42.6	196	13.3	1	38.5	2.74	18	1.55	17.71	18.03	17.1	79.92	328	25.8	1.1	2
217	1	41	43	89	95	89.67	8.65	149	43.1	352.285	12.8	1.2	32.9	3.1	13	2.02	24.2	28.1	36.7	146	796	248.5	3.6	2
218	1	25	40.1	89	96	95.33	10.41	155	45	309	11.9	1.1	32.2	2.87	13.7	4.27	14.9	30.4	9.9	104	663	78.9	10.384	1
219	1	20	40.2	89	98	96	9.15	152	43.3	270	11.3	1.05	22.6	1.99	15.6	5.44	63.5	31.2	11.1	84	395	82.5	10.384	1
220	1	23	37	89	98.5114	91.44	25.089	117	37.4	135	17.4	1.43	34.9	1.35	20.8	35.9192	21.8	149.4	12.6	121.4	1803.5	619.816	2.05518	1
221	1	28	38.6	89	98.5932	84.76	19.4	127	39.7	115	14.3	1.19	29.8	1.39	20.9	16.38	33	33.9	22.6	167.8	866	3332.54	1.64654	1
222	1	22	39.5	90	98	73.33	13.59	150	48.1	230	12.2	1.04	26.6	2.66	18.8	0.18	42	46.4	22.2	83.4387	903	233.2	1.52825	1
223	1	21	39.8	90	98	75	19.18	129	38.1	194	13.3	1.13	26.6	1.96	17.2	0.36	45	33.3	18	124.154	790	104.9	1.69191	1
224	1	20	39.3	90	90	88.67	9.85	145	42.9	193	12.6	1.1	22.1	2.07	17.8	0.36	28.5	18.8	15.2	108.5	526.2	430.57	2.3	1
225	1	20	38.3	90	100	97.67	18.6	153	45.1	108	18.3	1.71	32.8	0.53	23.3	1.647	107	40	12.3	100	2465	1528	0.8	2
226	1	22	40.3	90	97.5288	101.33	20.5	149	46.7	202	13.7	1.05	31.3	2.03	17.9	0.26	21.58	19.58	9.5	83.56	154	96.4	0.6	1
227	1	22	38.3	90	99	90.67	6.7	142	40.4	165	14.3	1.33	32.6	3.47	15.5	0.46	26	14	21.2	80	306	66.33	1	1
228	1	25	37	90	98	93.33	13.3	132	39.4	174	12.8	0.815511	23.5	1.57	12.8	0.3	13	21	16.9	82	154	342	7.2	1
229	1	19	40.4	90	98.5903	96	18.5	126	38.4	211	14.3	1.11	35.1	2.42	15.3	0.28	27.43	20.75	16.8	86.45	307	69	0.6	1
230	1	42	36.3	90	98.6021	93.76	16	144	41.6	184	14.9	1.21	29.1	1.47	18.9	0.16	49.3	56.4	8.4	114.2	213	254.816	2.54693	1
231	1	18	37.6	90	98.6296	86	11.5	131	39.8	117	17.1	1.41	36.1	1.62	12.6	0.02958	18.4	51.7	17.9	200.9	2269.1	262.229	2.3848	1
232	1	21	37.8	90	94.6657	96.67	6.5	100	30.2	21	61.6331	6.07956	139.821	0.512044	67.1594	0.676	443.2	895	28	220.7	12710.5	1317.63	8.50746	1
233	1	20	37.6	91	100	112.33	7.16	137	40	139	13	1.14	39.5	1.98	17.3	0.34	15	18	43.4	64	146	11.5062	1.2	2
234	1	20	38.1	46	99	64.33	4.616	142	43.6	147	11.8	1	19.2	1.93	20.1	18.19	17.9	19.7	13.2	94.4599	143	172.1	1.35294	1
235	1	23	38.1	92	99	81.67	16.27	127	40	134	16.9	1.4	51	4.57	14.6	1.14	28.3	7.348	17.55	91.4	305.3	18.8	1.4	1
236	1	26	40	92	99	94.67	9.03	149	42.2	137	12.4	1.08	32.1	2.08	16.6	0.021	35	19	37.3	86	733	105.7	1.27198	1
237	1	24	37.3	92	97	103.33	10.59	162	45.1	210	12.6	1.16	28.8	2.84	14.6	0.84	23.8	19.7	12.5	66.4	76	71	0.7	1
238	1	22	38	92	100	98.33	8.4	132	39.3	199	11.2	0.89	26.8	2.32	11.2	0.11	23	14	10.1	68	46	33	3.4	1
239	1	18	37.6	92	98.2049	82.49	15.6	146	44	225	16	1.29	28	1.63	16	3.61	49.1	137.9	18.2	125.2	3908	106.455	2.00385	1
240	1	20	37.6	92	98.1236	86.5	16.7	145	44	390.9	15.7	1.3	40.4	1.98	16.5	0.23	18.6	19.6	11.3	80	66.4	135.389	2.38279	1
241	1	76	40.5	93	96	87	23.7952	141	42.7	188	14.3	1.1	33.6	2.01	17.9	7.828	34	7	12.4	103	486	322	2.6	2
242	1	23	38	94	98	77.67	10.1	132	41.5	212	14	1.22	25.4	4.19	15.9	1.35	217	127	2.54756	52.8	206	569.1	7.2	2
243	1	21	37.5	94	98	90.33	5.86	138	40	129	13.6	1.16	32	3.66	15.2	1.75	30	24.2	9.4	80.426	225	60.3	0.35511	2
244	1	47	38	94	100	94.33	10.5	126	37.9	165	12.1	0.95	38.6	5.236	11.6	0.01	11	7	9.5	64	41	42	0.8	1
245	1	51	40.5	95	98	82.33	11.78	157	45.1	63.06	17.5	1.54	28.6	1.3	20.4	7.48	708	1547	3.86	4.6	438	409	0.9	2
246	1	25	38.8	95	100	96.67	8.48	165	50.7	203	12.8	1.11	26.8	1.94	17.5	0.26	15	32	12.4	118	259	53	3.4	2
247	1	23	37	96	98	63.33	12.04	158	47.3	264	12.3	1.07	24.4	2.16	20	1.85	53	14	4.85	0.5	221	12.2584	3.9	2
248	1	23	40.2	96	98	71.67	19.74	144	40.5	326	12.1	1.12	22.2	2.78	14.8	30.6	12.5	27.8	7.9	75	475	172.1	1.8	2
249	1	21	38.6	96	96	84.67	7.67	147	42.4	165	11.1	1.03	31.8	2.76	14.5	4.14	21.5	25.4	20.6	100.7	398	68.3	1	1
250	1	24	38.1	96	97	69.67	8.03	150	42.5	234	13.2	1.22	37.5	2.54	14.2	4.74	13.9	13.6	32.9	92.1	322	81.4	2	1
251	1	22	39	96	97	79	14.3	168	52.694	259	13.5	1.05	29.7	2.62	17	0.794	37	15	15.9	95	162	170	3.1	2
252	1	18	38.1	96	96	83.67	15.38	151	44.3	102	14.7	1.32	30.1	2.03	16.6	0.635	84	45.3	12.9	124	7154.98	2108	1.1	2
253	1	20	39.4	96	97	93.33	10.67	148	22.3511	209	13	1.2	28.2	2.87	15	2.95	24.1	27.5	16.9	96	215	78.8	2	1
254	1	21	40.5	96	97	94	6.12	126	37.4	255	12.5	1	32.4	3.18	14.9	0.71	302	328	12.2	98	22942.4	3386.95	1.6	2
255	1	24	40.9	96	96	87.67	6.28	136	39.8	213	12.6	1.16	30.1	2.4	16	1.24	15.1	18.2	18	71	266	46	1	1
256	1	21	37.6	96	99.9977	78.34	12	109	35.5	53	27.1	2.23	33.1	1.78	22	9.48	4233	4005.61	78.497	259.1	2559.1	21.1199	0.640715	1
257	1	25	37	97	98.4105	85.92	14.3	131	38.4	185	17.7	1.46	28.2	1.761	19.7	2.718	23.1	27.4	17.2	53.5	892.4	195.514	2.82557	1
258	1	25	37.7	97	99.9983	78.34	6.2	76	25.4	20.5511	16.3	1.34	37.1	1.51	12.5	35.9192	1712.6	1805.5	78.497	207.9	813.3	21.0907	0.640529	1
259	1	23	40.6	98	98	106.33	15.97	139	40.6	253	11.9	1.1	27.4	2.07	16.7	10.27	30.5	35.4	5.7	134.8	1176	2000	3	2
260	1	21	39.7	98	97	89.67	4.41	123	36.1	156	13.4	1.17	29	2.5	17.2	0.18	45.3	15.4	29	77.3	28	174.456	0.98	1
261	1	22	37.7	99	99	97.67	11.95	147	44.5	170	23.4	2.19	40.2	1.28	23.4	4.86	1596	1672	31.5	136	1034	215	1.9	2
262	1	21	37.6	99	98.7274	89.38	12.5	136	42.4	99	28.4	2.29	75.7	1.02	22.3	26.25	337.9	687.8	22.7	135.5	408.8	173.638	1.56265	1
263	1	23	37.7	99	98.1847	90.21	16.3	75.1022	22.8	390.9	10.216	0.98	35.1	3.69	15.2	0.33	32	41.2	14.3	178.6	254.4	136.504	1.55496	1
264	1	21	38	100	100	72	11.42	141	43	166	15.3	1.23	32.5	3.75	16.2	0.63	39.7	22.8	12.86	134	66.232	248.9	2	1
265	1	21	38.5	100	100	91	10.1	122	35.3	179	11.9	1.1	26.6	2.79	23.852	2.85	13	9	13.9	72	167	21.89	1.3	1
266	1	22	38.3	100	98	89.67	18.36	138	40.2	245	15.8	1.41	28.9	2.06	15.9	0.731	74.9	13.6	11.7	132	2592	3386.95	0.8	2
267	1	19	39.5	100	99	91	9.32	135	22.3511	159	15.9	1.42	36.3	2.25	15.9	0.48	196.2	312.3	11.1	91	344	34	0.35511	2
268	1	21	37.1	100	98.2232	91.12	16.7	134	40.1	66	18.1	1.49	26.2	1.813	13.9	0.995	61.4	94	7.2	127.9	721.6	416.667	2.55371	1
269	1	28	37.2	100	98.8493	90.82	8.9	120	38.6	59	27.6	2.27	38.4	1.02	24.2	5.75	50.3	75.7	23	211.6	1524	192.757	1.45509	1
270	1	21	40.7	101	98	86.67	8.11	136	40	223	13.2	1.22	29.9	2.63	15.4	2.79	29.8	41.9	14.6	85.7	1306	233	2	1
271	1	23	37.5	102	100	73.33	3.75511	139	40.7	50	13	1.08	26.4	1.21	15.6	4.7	113	95	19	65	471	184	0.53	1
272	1	20	39	102	96	103.33	5.4	119	36.5	149	12.3	0.91	27.4	2.39	11.4	0.25	16	9	11.6	69	64	36	3.9	1
273	1	21	37.4	102	99.1224	89.61	17.2	147	43.8	40	15.9	1.28	81.6	2.17	21.3	3.45	228.5	376.8	38.2	112.9	12504.7	83.845	1.29033	1
274	1	21	37.4	102	98.5201	83.19	4.8	150	45.1	117	13.4	1.12	33.9	2.49	15.2	0.02958	26.5	42.4	12.7	103.7	104.5	132.012	1.33616	1
275	1	24	37.5	102	98.8283	82.39	25.089	138	40.3	95	14.9	1.23	47.5	5	12.816	0.74	22.2	23.8	14.5	51.4	252.1	141.462	1.58299	1
276	1	22	37.8	102	98.9522	83.75	10.3	112	33	107	19.1	1.58	52.8	2.858	22.8	1.092	42.5	133.2	18.5	86.9	561.6	165.312	1.29026	1
277	1	20	37	103	99.2572	80.39	14.3	146	43.6	43	25.4	2.09	47.9	6.47182	13.4	4.35	39.5	76.2	12.9	107.7	764.7	182.563	1.50066	1
278	1	19	37.3	103	98.4056	93.71	16.5	121	36.6	152	15.8	1.31	30.5	2	17	0.29	55.1	7.348	8.8	100.3	696.4	183.826	2.41246	1
279	1	20	37.8	103	99.0567	101.81	13.6	131	41.9	20.5511	61.6331	6.07956	120	0.54	67.1594	32.53	201.1	353.7	41.5	261.3	320.7	377.023	1.21048	1
280	1	22	38.5	104	97	84.33	9.15	134	38.6	206	11.6	1.07	37.1	3.04	15.2	1.89	19.3	41.5	3.5	75	3986	161	1.2	1
281	1	21	36.5	105	98.9796	85.12	11	121	37.5	252	12.4	1.02	25.4	3.66	14.5	2.65	19.9	94.6	30.8	127.6	2539.4	88.5357	1.39427	1
282	1	20	36.5	105	98.4763	89.68	25.089	112	33.8	170	19.1	1.58	32	1.819	14.7	0.838	24.1	56.6	35.1	87.6	1122	99.1107	1.46103	1
283	2	20	37.7	105	97.8396	95.96	7.7	109	34.8	63	27	2.22	46.2	1.35	20.1	7.82	3334.3	4005.61	19.2	119.7	3002.4	266.211	1.44738	1
284	1	24	37.6	106	98	100.33	11.68	142	43.2	128	14.6	1.27	21.7	1.45	18.3	0.55	188	361	24.9	127	2501	286	2.1	2
285	1	20	37.8	106	98.3102	87.66	22.5	177	32.588	259	12.1	1	38.5	2	15.2	0.13	53.2	39.2	13	191.3	1628.2	211.339	2.73581	1
286	1	22	38	108	96	81.67	9.8	138	38.2	276	12.8	1.18	31.9	2.4	15.7	0.95	10.6	16.6	8.6	77	176	33.8	1	2
287	1	22	40	108	79.466	93	14.8	135	39.5	222	12.9	1.11	33.4	3.46	16.2	0.57	22.2	13.6	28.8	107.9	315.7	156.244	0.7	1
288	1	19	37.2	108	97.331	86.18	13	109	32.9	44	20.1	2.0904	44.6	6.47182	13.2	35.9192	29.5	75.8	7.2	104.5	639.7	283.502	1.78812	1
289	1	22	37.5	109	94	94	9.58	155	49	136	14.1	1.16	27.7	2.4	17.4	3.05	31	30	6.1	163	360	242	1.6	2
290	1	21	38.5	109	97	86.67	4.32	148	43.4	122	13.1	0.99	34.9	2.91	12.816	0.334	31	39	26	68	61	47.1	0.6	2
291	1	23	38	109	99	91	8.66	169	49.5	303	14.5	1.12	35.8	2.78	17.7	0.757	62	81	19.7	185	532	500	9.6	2
292	1	30	39.4	109	100	114.67	5.9	131	36.8	104	11.4	1.05	29.5	2.41	15.3	0.087	197	84	11.7	33	795	879.3	1.3	1
293	1	20	37.7	109	99.0288	85.03	3.8	103	29.5	29	19.1	1.58	29.4	2.424	15.2	1.057	167.5	311.6	19	74.9	507.8	181.678	1.02573	1
294	1	23	41	110	98	70	9.89	138	39.7	218	12.3	1.14	33.5	2.06	16.8	2.13	17	26.6	6.3	102	613	82.6	2	1
295	1	23	37.5	110	99	114.33	15.99	148	44	313	12.6	1.05	39	4.22	15.8	0.32	19.1	17.5	12.19	91.5	220.3	51.1	2	1
296	1	30	36.8	110	99.9978	78.34	4.616	98	32.1	68	52.7	4.33	44.3	1.15	19.3	8.14	1450.7	2886.1	73.2	87.7	14771.5	21.1144	0.640718	1
297	1	20	37	110	99.0399	82.53	21.6	145	44.3	45	17	1.4	29.8	6.47182	13.9	0.97	20.4	41.7	8.8	133.1	333	179.983	1.61105	1
298	1	20	37.5	110	98.8036	85.75	6.2	177	52.404	230	17.1	1.41	89.1	1.35	21.3	4.48	59	71.8	11.5	155.6	202.5	160.613	2.47207	1
299	1	23	37.5	110	98.7579	87.51	18.5	137	40.4	117	26.8	2.16	53.4	2.03	13.6	1.89	89.8	184.2	16.8	200.4	2145.8	223.146	2.28131	1
300	1	18	38.2	111	92	91.67	5.1	141	40.6	146	11.8	0.95	25.8	3.27	13.8	0.23	9.5511	13	8.5	80	76	82.0391	0.35511	1
301	1	20	39.8	111	99	106.33	11.06	153	44	195	50.7	3.8	69.8	1.48	24.7	3.1	28	106.2	35	209	5417	493.21	1.2	2
302	1	24	38.6	112	98.1237	92.03	19.6	116	36	251	13.4	1.11	26	1.81	18.2	0.18	19.2	26.3	9.7	124.4	314.6	751.226	2.38229	1
303	1	20	36.3	113	99.1788	81.8	9.2	123	36.2	41	17.6	1.41	66.8	6.4	26.2	2.69	55.3	65.9	5.764	76.7	823.8	158.487	1.47076	1
304	1	21	37.3	113	98.4723	87.98	23.7	118	36.2	63.06	27.136	1.4	48.9	1.2686	23.852	2.29	21.7	32	21.8	205.104	339.8	179.314	1.59336	1
305	1	21	38.1	114	99	76.67	14.94	152	44	236	13.5	1.05	38.1	4.33	14.8	0.22	20.7	21.8	23.25	74.5	40.3	89.2	1.2	1
306	1	19	37.6	115	98.8957	85.61	13.4	131	36	140	12.9	1.07	40.5	4.08	14.1	2.31	77.2	58	28.7	53	105.4	104.605	1.35114	1
307	1	23	40.6	116	100	83.67	11.92	125	36	166	12.7	1.06	28	3.39	17.5	0.49	42	39	22.6	53.538	728	284	1.07	1
308	1	20	36.8	116	99.2731	84.41	12.7	119	36.2	28	44.9	3.64	56.3	1.89	67.1594	2.48	498.4	1212.8	49.8	234.6	22942.4	12.2584	0.949238	1
309	1	19	38	118	97	96.33	15.19	157	46.6	242	13.9	1.22	23.6	2.86	17.6	2.93	46	21	5.44	8.8	178	195.5	0.6	2
310	1	21	36.6	120	99.6109	85.15	14.9	145	45.3	20.5511	17.6	1.45	43.8	2.21	23.6	7.55	278.2	477.7	22.8	304.491	22638.4	269.697	1.23168	1
311	1	40	39.9	122	79.466	88.67	8.57	157	46.6	288	13.8	1.11	28.8	3.01	14.4	1.21	85	50	13.6	133	836	571	9.79303	2
312	1	20	37.6	123	98.7204	84.84	6.6	119	36.1	91	14.3	1.18	18.7511	1.5	16.9	2.41519	47.6	139.1	19.5	65	15212.5	166.155	1.16562	1
313	1	21	37.2	127	99.1146	64	25.089	138	40.8	62	24	2.17	114.3	5.62	24	29.44	4233	4005.61	53.8	101	1836	367.4	6.7	2
314	1	20	38.8	127	96	90.67	14.32	131	40.3	205	12.9	1.12	29.4	1.7	18.5	0.192	24	16	10.9	70	190	87.14	2.11449	2
315	1	19	39	130	90	88.33	16.36	177	52.404	53	61.6331	6.07956	139.821	0.6	56.7	20	1117	306	24.32	288.6	1956.5	1200	9.79303	2
316	1	22	38.6	130	99	78	10.64	127	36.1	352.285	13.9	1.21	33.8	2.36	19.9	0.12	15.8	12.9	9.6	89.9	21.2	26.88	0.81	2
317	1	19	38.3	130	98	93.33	14.8	137	40	242	13.3	1.24	31.9	3.44	15.8	0.34	34	18	29.4	79	831	330.6	1.8	2
318	1	25	36.8	131	99.9982	78.34	13.5	75.1022	22.3511	35	20.9	1.7	48.9	3.15	16.2	19.34	443.1	114.5	78.497	304.491	104.4	21.0944	0.640545	1
319	1	26	37.4	132	99.9701	78.42	23.7952	137	40.5	168	15.5	1.29	74.1	2.85	14.3	7.74	180.3	621.8	54.6	154.2	5353.1	22.6026	0.649242	1
320	1	21	38	133	97	140	17.91	129	37.3	239	12.2	1.07	25.4	1.98	20.4	1.08	34.5	41.4	17.6	75.4	273.1	268.902	0.86	2
321	1	19	37.7	137	99.9978	78.34	11.7	117	35.5	21	30	2.421	41.1	0.512044	26.2	2.394	4233	4005.61	78.497	208.4	4256.4	21.1189	0.640707	1
322	1	19	37.4	140	98	83.33	20.17	138	43.3	181	12.9	1.09	26.5	1.58	21	2.68	43	23	8.8	119	452	900.6	2.2	2
323	1	20	38	140	90	113.33	13.65	177	52	133	22.2	1.83	39.2	2.9	18.5	20	342	214	12.9	155	1320	1849	7	2
324	2	21	37	140	97.8067	92.22	9.5	130	36.8	20.5511	22.7	1.87	34.8	1.947	14.5	3.426	448.6	1065.8	19.4	53.538	22565.8	252.347	1.22663	1
325	1	20	37.5	140	94.9332	98.21	8.5	153	46.4	23	61.6331	5.9	139.821	0.512044	25.8	2.81	305.3	517.4	8.1	241.8	5775.7	1178.51	7.24801	1
326	2	25	37.7	140	93.5732	93.28	12	117	34.5	57	38	3.13	50.9	1.02	16.8	35.9192	86.9	201.4	15.3	195.4	66.232	833.897	4.49332	1
327	1	21	37.5	143	99	104.33	25.08	133	42	169	39.8	3.27	129.9	0.6	52.4	20	521	281	23.3	304.491	1383	3000	9.79303	2
328	1	18	37.3	145	98.4598	83.69	5.1	147	41.8	41	16.4	1.32	40.4	6.044	14.1	0.919	113.5	243.4	16.4	123.7	1438.7	147.2	1.23048	1
329	1	20	36.8	150	98.0081	100.27	18.3	128	39.5	80	42.1	3.47	139.821	1.416	26.2	7.733	28.8	87.4	8.4	138.5	801.3	1715.86	8.72696	1
330	1	24	37	154	98.3515	87.56	20.4	138	44.1	30	17.6	1.413	38.7	1.654	17.8	2.381	96.6	98.4	11.2	135.2	1507.5	608.961	2.35163	1
331	1	21	39.5	154.602	100	72.67	14.6	116	35.8	182	20.1	0.8558	93.2	2.66	67.1594	20.1	9.5511	93.2	23.3	114.8	61.7	100	9.79303	2
332	1	23	37.7	154.602	98	89.67	13.48	123	38.6	155	14.5	1.28	59.4	1.94	19.2	3.52	41	30	17.6	134	398	44.48	3.1	2
333	1	20	37.8	154.602	90	154	8.13	152	45.6	166	17	1.51	33.3	1.73	16.4	2.29	980	865	19.9	78	1134	1000	0.66	2
334	1	28	36.9	154.602	98.5737	84.76	11.7	109	33.3	68	19.4	1.6	54	6.25	12.5	4.3	118.4	126.6	16.2	54.1	1712.1	146.717	1.67215	1
335	1	23	38.6	98	100	102.33	23.83	165	40	109	22.39	1.87	47.15	1.5	18.48	7.48	702	1176	26.56	155	1277.4	683.74	8.8	2
336	1	22	38.6	72	99	92.67	8.21	147	43.1	200	15	1.2	40.1	2.74	16.2	0.26	49.2	26.1	12.46	91.7	1323.8	257.1	0.9	1
337	1	21	38.3	75	99	88.67	10.93	139	42.9	141	15.7	1.27	39.1	2	17.5	0.15	24.1	11.2	20.93	72.2	204.4	74.1	1.1	1
338	1	22	40	62	99	90	17.43	166	49.2	193	13	1.25	23.2	2.1	18.4	0.62	39.1	18.3	10.4	126.9	452.5	265.057	0.6	2
339	1	25	39.8	57	98	90.33	16.32	144	44.4	124	22.8	2.04	33	2.03	17	4.19	200.6	141.2	18.9	112.7	596.2	861.628	0.6	2
340	1	22	36.5	58	95	101.33	8.1	145	44	210	11.2	0.97	27.1	2.08	17.1	0.76	136	60	6.1	52	6748	112	1.5	2
341	1	23	36.2	65	99	86.67	10.85	149	46	185	13.2	1.16	27.8	2.81	15.41	0.37	23	18	16.1	57	357	59.6	0.7	1
342	2	21	36.5	64	99	80	5.09	126	37.2	243	10.7	0.92	26.1	2.34	16.1	0.15	32	172	14.2	85	47	36	0.6	2
343	2	19	37.8	83	99	75.67	5.1	139	41.4	201	10.3	0.89	29.3	2.61	18.3	0.43	83	171	12.4	74	215	38	0.5	2
344	1	21	39.1	133	92	68.67	10.4	158.4	46.9	156	14.2	1.16	39.5	3.612	16.5	0.6	48	32	42.7	132	191	149	6.2	1
345	1	20	39.5	100	98	96.67	5.63	154	46	138	15.5	1.32	46.6	2.29	18.1	2.22	352	220	18.7	97	1133	38.5	1.2	1
346	1	21	38.6	95	100	90	17.87	155	46	198	14.1	1.21	32.2	4.9	16.1	0.27	13	17	17	70	185	27.9	1	1
347	1	23	37.6	76	96	81.67	12.8	158	50.7	150	13.5	0.85	25.5	2.26	15	0.93	27	18	13.3	157	275	124	2.7	2
348	1	22	37.3	84	100	82.33	8.69	147	47.3	162	14.8	1.03	30.9	3.31	14.1	0.38	41	24	21.4	144	427	259	1.5	2
349	1	22	37.5	68	97	53.33	14.16	116	38.3	156	15.9	0.94	28.3	2.15	15.8	0.77	55	41	19.7	106	212	171	2.5	2
350	1	22	37.6	70	100	96	9.13	129	41.7	201	15.8	0.86	25.9	2.82	13.5	1.25	34	16	20.6	118	931	768	2.3	2
351	1	22	38.9	102	99	91.33	5.66	136	40.4	105	14.1	1.24	69.8	1.86	17.1	4.79	352	531	19.1	122	609	468.6	2.8	2
352	1	23	39.5	98	99	71	13.77	147	44.2	317	14	1.23	70.6	2.35	16.9	0.27	113	112	25.9	106	615	332.3	5.6	2
353	1	24	37.2	89	99	83.33	12.16	152	44.8	173	13.8	1.21	32.8	1.76	17	0.38	126	175	19.7	111	296	39.7	1.8	1
354	1	21	38.8	113	99	73.33	9.96	142	41.5	183	15.7	1.39	27.1	2.05	19.2	0.15	50	61	15.1	112	292	209.5	2.9	1
355	2	19	38.1	77	98	68	14.62	143	43.1	213	15.9	1.41	57	1.71	18.1	0.03	23	17	16.9	63.9	121	52.7	0.9	1
356	1	24	38.4	108	98	75.33	19.03	150	44	83	36.8	3.43	38.5	1.17	23.6	4.06	4072	2313	124.4	288.5	41056	14206	3.5	2
357	1	25	36.1	68	99	86	16.2	147	40.6	233	11.7	1.08	28.3	3.04	15.4	0.051	31	35	21.3	73	370	55.99	3	1
358	1	22	36.5	84	98	71	13.2	138	41.2	135	12.2	1.13	27.6	2.61	17.5	0.187	67	49	5.3	100	541	422	1.8	2
359	1	19	37.5	83	99	87.33	10.9	147	43.9	139	12.8	1.18	31.1	3.04	14.6	0.151	17	17	19.2	67	101	23.73	1.191	1
360	1	21	37.7	92	98	81.67	7.36	139	40.3	214	14	1.21	27.9	3.77	14	0.164	18	14	24.3	95	151	177.2	1	1
361	1	30	41	110	98	86.33	7.84	130	40.2	196	12.2	1.05	23.6	4.87	17	0.31	19	20	10.3	116	155	184.5	8.7	2
362	1	29	36.8	62	100	90	6.73	121	39.8	206	12.5	1.07	31.3	2.69	15	0.46	24	17	22.5	67	308	211	1.43764	2
363	1	25	37.5	74	97	78.33	15.96	154	46.5	207	14.5	1.26	30.3	1.81	16.6	0.89	26	32	10.9	113	322	778	2.64791	2
364	1	24	37	64	100	76.33	5.83	147	42.4	253	12.5	1.07	28.4	2.31	15	0.28	33	76	21.5	105	149	58	1.95602	2
365	1	25	36.3	68	100	86.33	8.51	147	41.6	225	10.1	0.85	27.5	2.33	15.1	0.37	33	43	18.6	88	389	108	3.5	2
366	1	21	38.7	68	100	86.67	4.99	154	43.9	157	13.5	1.16	33.9	3.05	16.1	0.08	19	26	14.3	93	167	29	1.7	2
367	1	26	36.3	66	100	107.33	11.66	157	45.9	136	12.9	1.1	31.2	2.44	16.1	0.04	32	30	17.2	90	343	88	2.1	2
368	1	28	37.2	86	100	111.67	5.51	151	45.1	166	12	1.02	30	3	14.4	4.15	44	112	13.5	85	246	37	0.9	2
369	1	21	42	120	85	96.67	10.1	154	46.9	276	13.4	0.9	31.5	7.8	14.4	0.14	29	20	24.3	86	534	44.64	1.1	2
370	1	26	38.4	82	97	91.33	19.71	163	51	296	11.1	1.01	27.8	2.7	16.1	0.27	25.4	32.8	11.1	113.2	273	176.8	1.6	2
371	1	24	39.9	89	97	96.33	8.21	157	44	210	11.1	1.01	30	3.06	14.7	0.08	33.4	49.6	19.8	83.45	1730	114.1	0.8	2
372	1	22	36.3	50	98	82.33	8.95	143	42	67	14	1.25	34.4	2.09	18.3	0.23	864.3	1679.9	60.4	98.68	256	16.4	1	2
373	1	21	39.8	98	97	90	8.57	153	45.1	161	14.1	1.18	25.9	1.85	16.7	1.69	937	425	20.2	88	180	56.3	2.3	2
374	1	35	38.8	94	99	84.33	14.4	159	47.3	157	12.9	1.13	32.9	4.16	15.4	0.41	23	27	12.5	70.5	180	32	1.35273	2
375	1	24	37	84	95	96	9.13	158	46.4	313	11.1	1	30.1	2.78	14.8	0.41	14	16	7.5	66	143	27	2.8	1
376	1	22	37.8	72	98	93.33	6.92	118	38.5	239	13.9	0.97	28.6	2.41	14.6	2.8	44	23	15.4	82	965	150	1.3	1
377	1	22	37.2	74	100	105	9.1	146	41.8	283	12.5	0.99	30.1	2.48	14.8	0.26	21	16	25.1	82	305	47	2	1
378	1	23	36.8	94	100	79.33	11.86	146	43.4	186	14.4	0.86	32.4	2.61	12.9	0.22	20	12	21.8	82	231	85	1.6	1
379	1	23	37.6	76	100	76.33	7.81	144	43.9	200	14.5	1.08	32.5	2.78	14.4	0.45	21	20	43.2	97	125	52	0.8	1
380	1	21	37	54	100	92.67	7.74	134	41.9	259	12.8	1.08	32.5	2.31	15	0.33	22	26	15.6	73	242	52	0.9	2
381	1	20	37.9	68	99	97	5.79	145	43.2	193	12.3	1.05	31.5	2.52	14	0.43	14	10	13	81	137	36	1.5	2
382	1	23	37	52	98	89.33	7.24	131	37.5	194	13.3	1.3	39	2.43	13.9	1.25	8	13	18.7	63	151	32	1.3	2
383	1	25	37.3	76	100	107.67	6.78	156	46.6	229	11.7	1.18	35.3	2.53	15.6	0.23	33	42	12.2	77	654	182	1.4	2
384	1	20	37.2	62	98	102	7.86	101	30.5	163	14.3	1.13	33.9	1.51	16.6	0.13	9	14	9.7	66	165	39	1.3	2
385	1	24	38.2	110	90	85	13.14	154	44.1	137	14.84	1.24	31.2	2.37	14.37	0.24	23.2	28	53.5	82.2	228.9	214.4	2.3	1
386	1	21	41	120	94	73.33	12.91	131	41.7	247	13.6	1.19	32.1	1.59	16.2	0.32	23	45	8.3	62	316	21	0.5	2
387	1	23	36.2	112	100	102.33	7.36	137	39.3	244	12.88	1.07	29.63	1.78	17.16	0.17	24	23	18.12	69.6	206	13.74	1.3	2
388	1	21	37.2	100	100	82.67	21.03	138	39.9	223	12.8	1.07	29.14	2.16	16.53	0.42	28.9	31.72	10.15	132.6	446.04	343.66	1.4	2
389	1	20	36.8	98	100	75.67	9.97	142	41.6	162	12.7	1.1	24.9	1.88	19.9	0.59	27.3	16	7.6	123.65	349.8	172.1	6.7	1
390	1	30	39.2	151	96.2	84.33	12.59	168	53.1	307	11.7	1.01	22.7	1.72	20.1	0.17	47.5	36	8.66	186.28	883.5	285	1.7	1
391	1	21	38	152	98.1	88.67	15.73	160	52.4	219	13.6	1.18	26.8	1.72	20.4	0.35	32.1	26	6.12	158.35	327.9	85.8	1.7	1
392	1	22	37.3	96	100	69	13.67	159	43.6	177	12.4	1.07	25.3	1.94	17.4	0.71	27.8	29	13.56	114.25	143.6	613	2.3	2
393	1	19	38.5	87	99.7	73.33	9.71	150	46.8	277	10.8	0.93	27	2.92	16.6	0.32	36.7	20	7.01	143.09	506.8	174.8	10.5	1
394	1	19	38.6	133	97.9	86.67	10.4	125	38.5	274	11.8	1.02	21.5	2.33	16.6	0.44	71.6	44	12.18	137.81	337.53	268.5	16.5	1
395	1	20	37.6	73	99	79.33	17.79	146	42.3	223	14.8	1.31	30.8	1.69	19.1	0.09	29	43	16.2	110.6	647	365.7	2.3	1
396	1	25	38.6	99	98	93.33	12.76	155	45.9	155	16.7	1.49	38.9	1.48	18.5	0.97	370	192	32.1	181.4	6516	5471	3.5	1
397	1	22	36.3	88	97	115.33	8.78	151	44.9	199	12.7	1.11	25.2	3.03	16.4	0.82	37	24	13.4	165.9	585	106.7	1.66433	1
398	2	19	38	80	99	79	6.88	117	34.1	289	13.4	1.18	23	2.48	16.3	0.44	20	19	9.1	64	97	47.4	2.2	1
399	2	19	38.4	90	99	100	9.74	126	37.3	216	13.5	1.19	32.6	2	18.1	0.21	26	35	16.2	57.4	110	21.4	3.2	1
400	1	22	38.3	64	99	93.33	11.46	149	45.2	266	13	1.14	30.2	2.45	17.5	0.05	121	37	25.9	112.5	4018	479.8	2.2	2
401	1	23	41.2	136	98	70.67	14.72	167	49.8	319	15.6	1.38	30	1.91	17.5	0.23	504	680	12.3	154.3	2168.7	328.9	7.4	2
402	1	22	37.5	119	99	91	9.26	163	47.1	231	13.5	1.19	36.5	1.85	17.6	0.2	27	26	17.3	123.1	260	101.5	2.9	1
403	1	25	39.2	143	98	88.33	4.82	143	42.2	190	13.5	1.19	31.7	3.18	15.3	0.18	20	15	18.8	117.9	168	119.2	2.5	1
404	1	20	38.4	65	98	92	10.1	133	40.7	226	12.1	1.12	30.1	2.47	16.2	0.054	19	33	9.7	68	220	28.07	1.3	2
405	1	22	36.6	68	99	94.67	5	133	41.7	160	11.9	1.1	34.8	3.4	14.5	0.05	25	24	16.9	54	495	34.96	1.32656	2
406	1	21	36	79	99	92.33	6.9	156	48	191	12.3	1.14	34.5	2.81	14.1	0.01	25	25	14.4	99	357	21	1.37791	1
407	2	27	39	107	98	82	10.7	116	36	248	11.9	1.1	33.4	3.57	14.1	0.112	15	14	10.2	68	74	20	1.29222	2
408	1	23	37.3	95	100	96.33	6.7	136	42.5	191	12.2	1.13	30.4	2.82	14.9	0.036	25	14	15.2	89	613	67.07	1.3	1
409	1	18	36.8	45	98	105.33	4.5	132	39.5	171	13.1	1.22	34.8	3.08	15.8	0.132	23	24	11.3	60	369	18	1.14366	2
410	2	24	38.7	102	100	97	11.1	119	36.7	176	12.1	1.12	31	4.34	14.2	0.072	18	5	9.5	61	207	23.89	0.6	1
411	1	21	37	73	99	99.33	5.8	134	41.2	235	11.5	1.07	24.8	3.08	15.4	0.04	20	17	12.3	80	255	125.5	1.43592	1
412	1	21	38.7	73	99	89.67	5.4	129	38.1	190	12.8	1.19	30.3	2.71	14.6	0.09	15	11	14.1	55	174	21.08	1.27338	2
413	1	20	39.5	77	98	81.67	11.3	149	43.7	192	12.7	1.18	30.2	3.61	13.1	0.304	27	13	17	63	488	58.04	0.9	2
414	1	22	38.5	60	99	76.33	4.7	129	38.2	174	12	1.11	31.8	2.81	15.4	0.084	34	19	45.6	72	423	36.7	1.57533	1
415	1	25	39.5	130	99	100	14.95	135	50	458	12.8	1.14	30.7	2.83	20.6	0.034	19.1	25.6	22.2	122.25	145	109.2	1.5	2
416	1	23	38.6	98	100	102.33	23.83	165	40	109	22.39	1.87	47.15	1.5	18.48	7.48	702	1176	26.56	155	1277.4	683.74	8.8	2
417	1	21	40.6	100	100	85	21.03	138	39.9	223	12.8	1.07	29.17	2.16	16.5	0.42	24	19.2	17.6	140	461	343	1.7	2
418	1	23	40.5	112	99	83.67	7.36	137	39.3	244	12.88	1.07	29.63	1.78	17.16	0.17	26.8	26	25.3	87.4	206	13.7	1.7	2
419	1	26	40.6	125	100	101	9.62	134	39.6	186	12.4	1.05	24.4	5.7	14.1	1.09	38	74	9.78	57	1021	37.6	1	2
420	1	72	38.3	85	100	119.67	5.79	132	39.5	59	11.8	1	26.8	4.68	13.9	9.13	31	36	31.7	80	277	119.5	2.8	2
421	1	23	38.5	140	97.4	96	12.12	144	40.8	134	18.52	1.54	31.62	1.4	18.25	0.8	52.9	31	12.2	142.4	1983.7	1784	3.1	2
422	1	34	39.7	120	94	91.33	15.76	142	41.4	226	13.6	1.13	29.19	2.4	15.76	0.88	31.7	25	18.5	81.3	154	11	1.9	1
423	1	30	39.9	135	96.5	86.67	9.93	140	42.2	194	14.25	1.18	25.02	2.13	14.82	0.1	27.1	19	13.7	58.3	368.8	31.6	1.7	1
424	1	25	37.8	122	97	100.67	10.88	161	47.4	273	14	1.23	29	2.75	17.4	0.15	35	20	15.6	114.6	253	142.8	2.1	1
425	1	22	38	76	99	85.67	7.76	130	39.5	188	12.8	1.12	26.4	2.55	17.5	0.4	34	23	11.2	85	468	128.7	1	1
426	1	20	37.5	81	99	82	10.22	185	55.5	254	14.6	1.29	29.9	1.83	19	3.83	27	26	22.1	112.1	138	43.2	1.7	1
427	1	24	38.4	113	99	85.33	13.52	128	38.6	140	16.2	1.44	26.3	2.23	19	1.24	171	51	24.5	116.5	7717	1000	1.6	1
428	1	21	36.8	92	98	100.33	17.07	139	41.6	247	13.5	1.19	27.9	3.08	18	0.25	83	39	15	74.7	2351	151.6	1.1	1
429	1	22	39.3	119	98	77.67	9.11	138	40.7	156	13.9	1.22	30.7	1.72	17.7	0.15	38	41	13.3	97	283	139.5	10.3	1
430	1	24	38	72	98	76.33	9.29	148	44	200	11.7	1.02	27.6	1.91	17.8	0.6	116	191	34.6	97.1	722	286.2	2.6	1
431	1	22	38.8	75	100	125	11.09	145	42.3	197	14.1	1.11	34.4	2.8	17.4	0.68	60.5	34.3	20.48	101.9	1900.2	565.1	1	2
432	1	21	39.5	88	100	89.67	10.57	145	41.9	237	12.7	0.97	40.3	3.29	17	0.16	24.8	21.3	21.91	88.6	351.4	14.3	3.2	2
433	1	24	38.5	50	100	91	13.72	168	44.4	201	14.3	1.13	41.5	2.06	16.3	0.26	31.2	22.3	22.05	99.2	1178.3	325.3	4.69	1
434	1	31	38.8	70	100	105.67	7.38	141	39.4	236	13.6	1.06	32.1	1.79	18.3	3.44	31.1	38.5	9.65	70.9	119.3	28.1	1.1	2
435	1	24	43.6	129	88	98.33	7.87	147	40.6	165	14.3	1.13	42.7	2.98	16.4	0.18	35.4	34.4	28.28	78.7	759.5	662.6	1.1	2
436	1	21	40.6	100	100	88.67	8.06	134	37.5	270	14	1.1	35.4	2.43	17.5	0.22	22	11.9	11.36	71.2	209.9	260.7	1.2	2
437	1	19	39.8	87.5625	97	79.33	6.24	123	37	208	13	1.13	26.9	1.62	21.2	0.84	19	10	20.9	69	314	42.6	4.37	1
438	1	26	39.7	118	97	86.67	6.2	134	40.3	446	10.1	0.87	23	3.41	19.5	1.1	45	93	7.4	74	385	82	0.8	2
439	1	20	37.1	92	98	91	5.57	147	43.9	236	10.6	0.89	24.8	2.42	17.9	0.14	15	14	8.6	80	66	60	0.7	2
440	1	22	39.3	86	97	102	10.34	142	41.7	228	11.3	0.89	23.3	2.05	26.5	0.45	37	54	11.2	102	237	200	7.1	1
441	1	24	38.6	80	97	74.33	11.02	153	44.4	170	13.9	1.26	22.6	2.05	14.9	0.224	46.8455	26	8.75	134.8	350.29	182	5.1	1
442	1	26	39	99	98	97.33	12.86	122	35.7	223	14.2	1.28	37	1.88	16.8	0.085	34.0067	9	7.47	70.7	657.457	30	1.5	1
443	1	22	36.5	66	99	106	8.36	155	44.8	298	12.8	1.09	28.4	3.31	14.2	0.15	28	21	19.8	102	632	926	2.3	1
444	1	23	36.9	70	100	96.67	11.47	152	43.2	204	14.2	1.22	33	2.28	16.1	0.67	20	13	18.4	90	179	68	1.4	1
445	1	22	37	60	99	96	7.75	147	42.2	194	14	1.21	34.4	2.43	14.8	0.23	20	18	17	80	172	47	1	1
446	1	23	37.9	78	96	86.67	14.88	143	43	213	14.7	1.28	29.9	3.05	14.4	0.53	26	13	28.9	87	618	273	1.2	1
447	1	23	40.1	86	100	87.33	16.07	133	39.1	210	15.6	1.36	34.3	3.22	13	0.1	21	23	28	102	162	44	0.9	1
448	1	23	37.5	61	97	97.67	22.05	147	43.6	212	12.5	1.07	26.8	1.75	16.9	0.34	20	23	10.5	92	127	109.7	0.5	1
449	1	23	37.5	76	98	104.67	9.1	131	39	258	12	1.11	27.4	2.43	14.9	0.029	65	25	19.7	107	5125	163.2	1.1	2
450	1	21	38	62	98	80	7.1	116	35.1	297	12.6	1.17	30.8	3.93	12.3	0.053	20	18	28.8	58	180	48.81	1.2	2
451	1	32	38.5	101	99	89.67	6	161	49.7	221	11.6	1.08	36	3.32	13.1	0.079	98	179	9.8	73	201	23.51	0.9	2
452	1	22	36.3	62	98	104.33	8.8	127	40.5	176	12.7	1.18	31.9	2.96	15.3	0.062	40	25	13.9	62	2675	172.4	0.6	2
453	1	27	41.2	80	98	98.33	12.4	145	42	251	11	1.02	27.3	2.91	14.4	0.145	19	7	9.9	104	260	228.9	1.821	2
454	1	24	37.5	81	99	90	23.77	147	45	117	17.7	1	45.5	2.33	13.9	5.3	850	750	34.4	131	2926	75.28	1.8	2
455	1	19	38.2	72	99	85	10.2	147	44.4	253	14.8	1.22	27.9	2.01	15.6	0.22	20.8	22.6	14.7	94.4	401.5	146.74	1.9	1
456	1	19	37.8	68	82.8	85	8.9	125	37.9	198	14.4	1.2	29.3	2.2	15.1	0.29	10.2	17.5	11.9	90.4	140.8	53.02	2.8	1
457	1	23	37	80	95	60	9.9	121	38.8	300	13.5	1.12	31.8	2.01	17.2	0.25	25.2	26.8	15.4	85.9	530.9	217.66	2.2	2
458	1	23	36.6	74	80.6	86	6	136	42.2	168	12.7	1.05	28.3	1.7	18.3	0.16	19.6	22	20.4	73.2	367.6	103.17	2.7	1
459	1	24	36.1	57	99	76.67	13.7	152	45.8	289	14	1.26	25.5	2.76	18.4	0.27	30.7	35.1	12.2	130.5	237	98.09	0.9	1
460	1	20	36.7	57	99	81.67	11.3	139	25.2	292	13.1	1.09	25.7	1.59	16.2	0.18	20.3	28.3	22.9	74.8	699.9	236.9	0.9	2
461	1	23	36.5	60	99	79.33	8.3	134	40.2	234	12.3	1.04	33.8	1.45	18.8	0.19	13.5	21.7	19.1	85	226	52.04	0.9	2
462	1	22	37.4	60	77.9	103	9	142	42.7	190	12.1	1.01	32.4	1.81	16.7	0.2	18.5	24.3	7.6	87.8	370.4	70.44	2.3	1
463	1	23	40	130	99	85.67	18.5	137	40.4	117	26.8	2.16	53.4	2.03	13.6	1.89	184.2	89.8	16.8	200.4	2145.8	1007.98	3.21963	2
464	1	19	37.1	65	99	73.33	12.9	137	43	152	10.3	1.11343	22.6	1.91	17.9	0.3	14.6	12.4	15.9	68	420.6	632.88	2.60895	1
465	1	22	36	46	100	80	9.5	137	42.1	225	14.1	1.11816	31.2	2.327	12.7	0.287	30.6	18.6	12.4	73.4	383.3	20.66	1.50625	1
466	1	20	36.4	86	99	83	12.9	140	43.9	207	17.6	1.13745	38.1	1.92	17.4	0.34	145.9	69.2	42.3	130	709	827.75	4.3	2
467	1	19	36.8	46	100	66.67	7.7	153	46.4	196	12.3	1.03	39.2	2.41	13.8	0.22	162.7	410.3	14.6	61	255.5	37.11	1.36315	1
468	1	23	37.8	92	99	78	15.6	146	44	225	16	1.09137	28	1.63	16	3.61	137.9	49.1	18.2	125.2	3908	1234.99	5.29	2
469	1	18	38.1	100	99	100.33	16.7	134	40.1	66	18.1	1.1873	26.2	1.813	13.9	0.995	94	61.4	7.2	127.9	721.6	558.53	4.27	2
470	1	23	36.7	47	99	90.33	8.1	138	42.2	291	14.1	1.12792	28	1.43	17.3	0.18	19.8	14.5	18.9	97.3	174.6	48.99	1.71009	1
471	1	23	38.8	49	100	92	4.3	134	40.9	139	13.1	1.09	37.7	1.81	16.5	0.52	38.8	20	19.9	81.6	868.2	129.57	1.76	2
472	1	18	36.5	58	99	87	7.3	145	43.9	177	14.4	1.0783	25.6	1.44	18.4	0.5	665.2	830	12.2	75.4	146.4	27.34	1.52982	2
473	1	24	37.7	90	99	82	16	144	41.6	184	14.9	1.21	29.1	1.47	18.9	0.16	56.4	49.3	8.4	114.2	213	263.23	3.52842	2
474	1	23	39.6	92	98	93.67	16.7	145	44	243	15.7	1.3	40.4	1.98	16.5	0.23	19.6	18.6	11.3	80	66.4	24.17	1.4	2
475	1	26	36.5	65	100	79.33	18.3	134	40.9	175	12.9	1.07	24.4	1.42	17.7	0.14	20.5	23.9	15.7	107.4	149.9	278.22	2.72941	1
476	1	21	37.1	82	99	92.33	18.6	163	46.5	208	13.6	1.13	23.6	1.34	17.4	0.11	23.9	22.6	7.7	106.8	157.6	309.49	1.1	1
477	1	21	36.5	56	98	83	4.7	135	42	177	12.8	1.07307	27.7	1.78	17	0.48	23.4	17	11.1	59.9	362.7	27.07	1.35974	2
478	1	22	36.5	80	99	83.33	13.2	132	40.1	285	12.1	1.01	28.2	2.19	16.2	0.16	20.3	37.8	5	76.1	198.3	145.58	1.81	1
479	1	20	38.3	100	99	60.67	8.9	120	38.6	59	27.6	1.26826	38.4	1.02	24.2	5.75	75.7	50.3	23	211.6	1524	978.26	4	2
480	1	25	36.5	89	99	91	7.7	139	41.2	351	17.8	1.47	34.1	2.11	14.7	3.28	38.9	54.1	9.4	68.5	93.8	12.46	1.48279	1
481	1	20	36.8	52	100	84	11.4	125	39.6	227	13.1	1.09	27.2	2.18	16.6	0.14	34.1	28.9	9.8	108.1	707.1	112.14	3.7	1
482	1	20	37.5	102	99	86.67	10.7	149	45.5	301	12.3	1.03	28.1	2.49	15.4	0.18	18.4	13.1	9.2	52.9	80.9	89.0063	1.72936	1
483	1	20	36.5	56	98	76	5.9	137	43.7	157	14.4	1.2	29.4	2.16	15.5	0.14	18.3	14.3	16.4	78.9	149	11.98	1.07	1
484	1	24	36.8	55	98	91.33	7.8	149	46.2	234	11.4	0.95	32.2	2.2	16.2	0.17	23.2	39.4	14.5	77.4	214.8	32.95	1.40829	1
485	1	26	37.1	76	98	86.33	9.3	139	43	194	13.1	1.09	31.2	3.6	14.8	0.42	16.8	16.7	27.8	69.6	160.6	27.56	1.33387	1
486	1	21	36	60	77.9	103	9	158	48.3	252	13.5	1.18	28.1	3.12	18.8	0.55	24.4	22	19.3	105.9	436.5	55.12	3.06	2
487	1	19	37	54	100	87	7.9	141	44.5	250	14.4	1.2	34.4	2.27	16.4	0.11	20.1	17.9	13.8	69.4	147.2	18.14	1	1
488	1	22	36.8	102	97	80.67	16.5	146	45.6	252	13.2	1.16	22.7	2.22	18.5	0.18	21.9	12.7	16.4	79.9	325.5	185.06	7.6	2
489	1	23	38.1	78	99	85	8.5	133	39	108	13.3	1.17	25	1.88	18.2	0.97	15.2	13.1	14.6	85.7	109.5	44.87	5.01	1
490	1	21	36	59	98	71.33	6.7	132	41.4	298	14.1	1.24	26.4	2.34	18.1	0.62	21.5	20.1	33.3	77.5	283.1	29.28	2.14432	2
491	1	22	40.5	89	99	94.33	4.8	147	43.6	115	16.1	1.42	26.8	2.31	17.6	0.99	15.9	7.6	8.5	94.1	99.7	14.23	2.2	2
492	1	19	37	68	82.8	85	8.9	125	37.9	198	12	1	25.4	2.03	15.6	0.42	12.9	21.6	11.8	90.4	187.9	140.55	2.8	1
493	1	19	38.2	72	99	85	10.2	147	44.4	253	13.1	1.09	24.3	2.36	15.7	0.19	20.8	22.6	14.7	94.4	401.5	146.74	1.9	1

## Sheet: test
id	gender(1=male,2=female)	age	coreteamp	HR	SPO2	MAP	WBC	HB	HCT	PLT	PT	INR	APTT	FIB	TT	DD	AST	ALT	TBIL	CR	CK	MB	Lac	diagnosis(1=non-heatstroke,2=heatstroke)
1	1	18	37.8	58	99.0008	93.71	8.77	153	40.9	216	12.8	1.09	24.4	1.5	20.1	0.17	67.08	45	2.54756	64	196.7	47.4	3.7	1
2	1	18	37.9	62	90	85.61	7.3	140	38.3	196	12.9	1.15	31.2	3.35	14.9	0.58	20.5	11.7	13.8	57.4	22.2	21.4	1.07	1
3	1	18	38	65	98.9276	87.33	12.9	145	32.588	139	12	1.17	29.5	1.27	18.8	0.49	16.8	435	16.1	61	2269.1	37.11	3.1	1
4	1	18	37.6	54	100	79	9.61	137	46.3	166	17.1	0.8558	22.7	1.98	16.7	0.12	197	17	4.03	81.6	89	122.304	1.5	1
5	1	18	37.7	56	100	100	9.3	130	38.6	166	14.5	1.09	32.2	2.44	18.9	0.16	47.5	15	11.6	1.7	383.3	27.6	1.5	1
6	1	18	39.7	60	98	66.67	9.2	135	37.7	256	14.1	1.67	28.5	2.13	13	0.15	30	90	11.9	131	255.5	1037	2.52116	1
7	1	18	38.4	61	98	86.62	9.75	140	42.9	151	12.3	1.1	25.3	3.93	22.8	0.09	422.7	22.3	19.67	97.8	164.1	337.54	1.2	1
8	1	18	38.5	64	96	80	11.07	127	43.6	25	13.4	1	29.1	2.54	14.1	0.08	103.6	22.9	56.398	70	146.4	11.5062	1.2	1
9	1	18	39	70	100	95	15.08	121	44	193	14.4	1.3	29.2	2.45	18.3	0.2	49.3	9.8	20	92.9	420.6	101.622	0.7	1
10	1	19	37.3	80	99	79.67	8.3	131	22.3511	147	13.3	1.2	28	2.89	13.2	0.14	9.696	1387.64	5	108.5	156.8	430.57	1.9	1
11	1	19	37.6	80	98.6296	71	16.5	147	34.8	390.9	14.8	2.22	26.5	1.5	16.8	0.1	25.8	55	10.2	94.4599	1865	172.1	0.7	1
12	1	19	37.5	90	100	92.67	13.4	117	36.2	209	13.1	1.41	30.7	1.68	20.1	0.3	22	11	8.4	98.6	120.3	135.389	2.7	1
13	1	19	38	46	99.2616	95.33	18.11	126	36.2	63	14	3.64	27.4	2.17	12.1	0.18	28.8	162.7	23.3	90	42	78.8	0.7	1
14	1	19	38.4	46	99.7755	70.33	24.2	153	39.6	41	11.4	1.09	37.2	1.62	12.8	0.01	30.53	11.6	11.8	1.7	514	266.211	1.37474	1
15	1	19	36.8	46	99	86.67	13.1	134	43.7	28	15.8	1.2	33.3	2.23	17.8	0.43	19	665.2	17.9	65	92	158.487	3.61	1
16	1	19	37.7	50	99.3301	90	5.37	132	47.3	227	13.9	1.09	28.5	2.327	15.6	0.23	29	14.6	34.94	100.3	257.6	12.2584	2.3848	1
17	1	19	37.7	58	99.1167	86.67	11.12	158	36.2	198	10.216	1.16	33.2	2.41	16.3	6.82	497	22.9	12.4	53	168	112.14	1.2	1
18	1	19	39.6	65	100	94.33	11.5	154	44	176	11.4	1.02	21.8	1.87	16.2	0.35	37	16	23.7	67	100	11.98	1.46612	1
19	1	19	40.1	72	99	86	14.26	126	36.8	315	13.1	1.07	18.7511	1.44	12	1.14	12	7.348	3.21	80	54	201.869	1.24245	1
20	1	19	38.4	73	98	100	9.5	143	46	263	11.8	1.07	31.2	2.23	40	2.64	21.7	14	10.5	96	823.8	40	1.1	1
21	1	19	38.7	74	100	86.15	7.7	127	41.5	207	20.7	1.06	30.4	2.51	12.9	0.04	34.3	7.348	8.8	119.7	22942.4	36.2	1.29493	1
22	1	19	38.5	78	98.4056	86.22	4.94	157	48	187	12.6	1.06	23.4	3.26	17.4	0.02958	18.4	30.27	28.7	76.7	707.1	123.366	1.49388	1
23	0	19	41	103	98.8957	87.33	10.9	145	41.2	154	11.8	0.8558	25	2.18	13.2	0.11	23.8	26	19.2	100.4	149	24.9	1.3	1
24	0	19	41	115	99	88.6	6.88	133	41.6	256	15.7	0.99	29.2	1.9	17.8	0.287	18.6	28	9.1	76	1288.5	171	2.3	1
25	1	19	42	83	99	84.67	9.74	147	46.5	117	13	1.14	28.7	2.48	13.6	0.22	410.3	735	18.4	82.1	876	246.7	4.4	1
26	1	20	40.6	80	99	86	7.7	165	34.7	220	27	0.815511	32.9	2.59	12.9	0.35	40.8	52	11	1.2	443.1	670	0.6	1
27	1	20	41	90	100	86	4.3	133	42.8	225	17.6	0.96	27.1	1.82	13.4	0.5	41.1	20	21.1	66	149.9	82.3488	1.39079	1
28	1	20	39.7	46	99.014	77.33	16.61	131	35.6	157	44.9	1.12	36.1	2.41	20.3	0.3	26.36	17.2	2.66	67	800.9	88.6	2.3	1
29	1	20	37.6	49	98	94.67	12.14	96	39.9	210	13.1	0.8558	45.2	1.48	18.2	0.55	16	21.2	14.6	87.5	3246.1	47	1.35294	1
30	1	20	37.5	72	99	86	20.2	137	38.9	207	14.4	1.41	31.2	2.41	12.6	1	45	51.7	10.44	85.2	304	57	2.38279	1
31	1	20	37	75	99	86.73	18.3	129	37.9	226	12.5	1.15	39.2	1.81	14.6	0.61	45.3	21.3	12.2	200.9	696.4	114.563	2	1
32	1	20	36.8	84	100	99.33	10.31	123	36.6	175	13.3	1.14	38	2.05	12.7	0.06	337.9	30.6	23	64	105.4	154.19	1.44738	1
33	1	20	36	84	100	84.17	4.85	136	36	243	11.7	1.03	25.6	1.79	16.3	0.29	39.7	58	9.01	53.538	101	262.229	1.47076	1
34	1	20	39.3	88	99	88.67	9.88	141	43.9	176	12.9	1.04	41.6	2.54	18.1	2.31	13	17	16.2	61	97	32.7	0.949238	1
35	1	20	38.1	90	98.1236	64.33	20.25	122	34.1	209	13.7	1.11	36.3	2.35	13.8	0.151	29.8	19	14.6	68.4	110	154.74	2.41246	1
36	2	20	37.6	46	97	86.5	19.2	136	37.3	206	12.2	0.98	32.9	4.533	16.5	0.22	21.7	35	19.9	75.4	255.5	150.934	1.35114	1
37	1	20	39.4	92	97.8396	93.33	9.85	118	46.4	194	14.3	1.13	25	2.07	23.852	0.09	20.7	410.3	2.54756	68	868.2	26.4	1.191	1
38	1	20	37.7	96	99.1788	95.96	4.616	152	41.8	156	12.3	1.17	33	1.93	18.3	1.57	448.6	38.8	34.6	72.3	175	156.456	2.2	1
39	1	20	36.3	105	99.2731	81.8	16.7	130	38.2	99	13.3	2.29	62.376	1.98	18.2	0.21	13	609	10.7	58	1672	152.669	3.2	1
40	1	20	36.8	113	100	84.41	10.67	155	46.5	166	13.4	1.23	29.1	2.87	11.8	0.19	15.2	17	6	100.9	71	89.4	1.36315	1
41	1	21	36.8	116	98	84	7.7	142	40.7	179	28.4	1.1	23.9	1.35	13.8	0.04	894.834	35.4	27.6	52	790	587.2	1.19442	1
42	1	21	36.5	52	99	76	9.2	128	40.2	223	15.3	1.22	25.6	6.4	17.9	0.19	37.8	8	15.2	77.7939	28	226.3	1.6	1
43	1	21	36.7	56	100	112	12.7	145	43.9	63.06	11.9	1.4	22	1.89	18.4	0.19	23.8	83.6	13.2	4.8	45.7	37	1.45568	1
44	1	21	36.9	64	100	93.33	11.4	142	46.9	196	13.2	1.05	19.2	2.18	26.4	0.14	23.2	18.8	11.3	58	62	183.826	7.32	1
45	1	21	36.8	70	98.6472	73.33	5.9	145	41.3	222	27.136	1.87	40.4	2.16	16.4	0.31	171	19.7	12.86	70	2216	104.605	2.16304	1
46	1	21	37.9	76	99	92.33	8.29	148	39.8	177	13.5	1.21	28.2	2.44	16.1	0.01	23.2	19.6	13.9	3.3	526.2	23.73	0.6	1
47	1	21	36.9	65	99	99.33	13.8	109	32	152	22.7	1.39	46.2	1.78	18	0.1	77	27.5	14.6	89.3	143	125.5	2.05849	1
48	1	21	36.8	75	98.8404	91.33	8.3	123	42.1	218	12.9	1.14	66.8	2.15	12	0.2	29	4005.61	21.8	71	66.4	151.6	1.5388	1
49	1	21	37.5	76	100	94.67	8.2	119	46.4	141	12.8	1.07	56.3	1.42	17	0.36	13	65.9	23.25	106.4	215	309.49	1.69191	1
50	1	21	36.8	80	98	80	14.15	125	42	150	13.4	1.19	27.2	3.01	14.1	0.18	86.9	1212.8	19.4	57	3002.4	21	0.98	1
51	1	21	39.8	80	97	109.67	19.18	137	43.9	160	13.5	1.13	29.4	1.78	14.6	26.25	20	28.9	17	101	22565.8	143.8	1.56265	1
52	1	21	39.7	90	98.7274	75	4.41	161	43	152	12.3	1.11	26.4	2.74	14.1	0.63	35	14.3	15.1	70	185	21	2	1
53	1	21	37.6	98	100	89.67	12.5	156	39	140	13.1	3.13	30.8	1.85	15.4	2.85	19.8	14.6	14.4	124.154	292	90	1.3	1
54	1	21	38	99	100	89.38	11.42	134	36.4	139	13.21	1.19	49.9	2.81	18	2.79	830	31	12.3	77.3	357	96.4	2	1
55	1	21	38.5	100	100	72	10.1	139	48	289	13.4	1.23	24.4	2.327	17.4	2.29	12.4	16.1	15	135.5	255	257.1	1.59336	1
56	1	21	40.7	100	99	91	8.11	163	40.9	200	10.216	1.18	34.6	3.64	18.9	0.22	30.1	20.5	7.7	134	2351	101.5	1.2	1
57	2	21	37.3	101	98	86.67	10.29	113	41	231	13.4	1.07	31.8	2.51	17.1	3.426	48	36.6	5.8	72	157.6	36.7	1.22663	1
58	1	21	38.1	113	98.4723	87.98	20.85	151	43.3	174	26.8	1.09	39.5	5.22	13.4	0.27	27	47.6	12.5	85.7	178.521	20.66	1	1
59	1	21	37	114	99	76.67	13.43	113	40.8	225	18.8	1.05	29.5	3.69	12.7	0.15	18	26	7.9	205.104	337	21	2.9	1
60	1	21	38.6	140	97.8067	92.22	16.3	133	41.6	194	12.3	1.01	30.5	1.21	17.9	0.25	55.1	19	15	234.6	30	569.3	1.37791	1
61	1	21	38.8	95	100	90	23.7	149	38.1	318	36.8	1.35	40.5	4.22	16.2	0.11	77.2	18.6	9.5	108.1	33	37.1	1.43592	1
62	1	21	36	113	99	114.33	14.94	123	36.1	176	12.5	0.99	31.1	3.39	17.6	0.39	17	16	12.46	78.9	154	136.504	1.1	1
63	1	21	41	79	99	100.33	9.5	156	42.4	390.9	17.7	0.89	23	2.61	15.4	0.46	20	54.7	16.9	86.6	1323.8	184	1.1	1
64	1	22	42	73	99	92.33	17.87	134	43	50	14.9	1.19	32.6	1.88	12.7	0.3	26	19	19.2	2.1	260	51.1	1.54282	1
65	1	22	37.5	92	98	86	9.96	132	35.3	313	14.5	1.07	39.2	1.2686	22.1	0.03	162.7	41.2	5.764	114.4	408.8	284	1.5	1
66	1	22	40.3	82	99	84.33	6.9	145	40	166	12.8	1.18	37.7	2.95	17	0.26	20	95	49.8	107.4	66.232	85	0.8	1
67	1	22	38.6	109	99	88.33	5.8	143	39	186	12.4	1.22	31.6	1.81	19	0.26	569	17.5	9.8	80.8	167	48.9	0.8	1
68	1	22	37.5	151	99.2533	94.33	17.07	135	42.6	108	14.3	1.22	29.9	1.96	16.2	0.2	47	39	16.4	56.7	1306	478	2	1
69	1	22	38.5	76	98	101.33	18.6	151	40.1	191	11.9	1.08	25.9	2.5	18.1	0.084	52.3	12	6.7	75.9	339.8	104.9	1.23	1
70	1	22	36	90	98	92.67	3.75511	113	45.1	285	14.6	1.31	32.6	1.02	17.8	0.17	9.5511	13.1	2.74	69	40.3	174.456	0.7	1
71	1	22	37.8	72	97.5288	91	3.75511	131	44.1	210	12.4	1.07	36	3.75	12.8	0.13	50	1387.64	16.46	74.5	159	173.638	1.4	1
72	1	22	41	119	99	76.33	15.99	127	38.6	137	13.6	1.18	22.1	2.79	16.8	0.15	25	16.14	15.7	53.538	154	248.9	0.6	1
73	1	23	39	60	99	80	11.92	113	46.2	140	11.6	1.18	40.1	2.63	15.3	0.3	20	17	44.81	70	66.232	21.89	2.5	1
74	1	23	37.7	46	99	78.33	11.86	139	36.7	234	17.5	1.19	36.5	1.2686	17.4	35.9192	83	33.3	12.03	112	168	233	0.6	1
75	1	23	37.5	67	100	79.33	8.5	168	42.1	230	13.3	1.03	31.8	4.33	17.1	0.18	23.9	15.4	8	99	253	179.314	1.0634	1
76	1	23	37.5	70	100	85.33	6.7	149	39.4	213	13.4	1	31.2	1.947	17.7	0.15	19.1174	687.8	8.6	80	1882	89.2	0.7	1
77	1	23	40.6	72	97	90.21	16.4	135	34.5	174	13.5	1.22	28.8	4.9	18.6	0.16	27.12	22.8	18	74.7	149.9	252.347	0.8	1
78	1	23	36.8	99	98	73.33	20.5	147	42.2	57	13.1	1.08	24.6	2.05	17.8	0.14	12	9	29	106.8	160.6	27.9	2.5	1
79	1	23	38.1	102	98.1847	85	8.21	124	47.4	190	14.9	1.05	29.4	2.81	20.1	0.42	12	41.9	22.7	70.5	795	209.5	0.6	1
80	1	23	38.8	110	100	83.67	9.26	163	44.5	273	14.6	1.2	35.1	3.08	16.5	0.087	21.58	32	18.8	103.4	883.5	21	0.9	1
81	1	23	37.3	116	99	79.33	4.7	123	40.9	252	14.1	1.19	26.4	3.08	15	1.01	49.2	21.8	15.6	75	954	254.816	2.9	1
82	1	24	37.3	94	98	85	9.5	150	43	175	15.7	1.11	39	1.34	20.1	0.086	27	1065.8	5.9	93.6	22942.4	41	1.57533	1
83	1	24	38.2	78	100	83.33	12	134	36.8	194	12.3	1.11816	28	1.46	26.2	1.17	34	17	15.7	87.9859	66.232	63	1.50625	1
84	1	24	38.4	55	98.8543	92.27	4.82	139	53.1	104	11.5	1.16	32.4	2.47	67.1594	0.02	30.6	61	27.8	178.6	423	326	0.64	1
85	1	24	36.8	80	97	103.33	10.88	131	38.4	307	13.5	0.99	26.6	1.85	16.6	3.87	31	25	11.7	65	383.3	191.621	1.9	1
86	1	24	40.8	92	90	86.33	9.3	168	40.2	196	13.6	1.13	29	1.67	15.5	0.36	43.5	17	8.66	91.5	436	1044	1.30474	1
87	1	24	39.7	110	99	114.67	13.2	133	41.9	198	12.8	1.21	75.7	2.03	10.8409	18.19	20.2	39	33.9	53.538	391.4	12	1.55496	1
88	1	25	37	113	98	85.33	10.59	145	41.6	276	13.2	0.97	32.5	2.19	17.4	0.23	32	22.6	32.28	82	182	44.3	2.72941	1
89	1	25	37.7	55	98	91.33	13.14	145	32.588	184	13.2	0.93	26.6	2.84	19	2.95	113	20.4	13.1	85.7	254.4	87	1.33387	1
90	1	25	39.2	65	98	61.67	13.52	144	47	149	14	0.94	29.9	2.37	17.7	7.82	19.1	17.91	8.4	205.104	471	25	1.3	1
91	2	25	37.8	68	98	76.67	7.8	116	34.5	200	13.7	1.1	48.9	2.23	15.6	0.39	42	7	10.8	54	220.3	346.1	1.7	1
92	1	25	37	90	93.5732	93.33	8.32	157	45.6	257	15	0.91	38.1	2.2	19.6	0.2	20	12	8.59	70	728	57	2.5	1
93	1	25	36.5	140	98	93.28	7.17	120	32.5	241	13.5	1.12	34.8	1.6	16.5	0.33	44.6	19.58	15.4	83.56	231	47	2.1	1
94	1	26	37.1	143	98	88.33	13.3	147	39.4	90	12	1.44	32.2	2.9	12.4	4.7	28.5	26.1	21.9	91.7	109.5	186.3	1.6	1
95	1	26	39.4	122	97	100.67	18.3	163	36.2	252	14.1	0.95	27.1	1.57	17.2	0.32	17.9	36	8.6	123.1	7154.98	44	2.54693	1
96	1	26	39.2	68	99.2535	91	9.3	129	46.7	168	14	0.85	34.5	1.02	17.2	0.49	18.6	11	29.1	72	198.3	100	1.27265	1
97	1	30	39.2	65	100	79.33	5.9	137	43.1	181	11.4	1.02	24.8	3.18	22.3	0.22	24.1	128.2	21.8	73.4	219	134	1	1
98	1	30	43	76	98	92	12.59	140	47.1	182	13.3	1.08	27.9	3.25	16.2	0.97	3334.3	52.7	14.6	195.4	35	44.87	1	1
99	1	31	43	68	100	84.33	8.64	141	38.2	206	10.216	1.05	23.6	2.26	23.852	2.347	55.3	56.4	56.398	117.9	61	3332.54	1.25738	1
100	1	39	36.3	52	96.2	82.67	4.38	152	42.1	167	13	1.07	32.4	2.78	15.4	0.16	498.4	19	5	114.6	303	253.871	1.28603	1
101	1	41	43	76	99	98.67	12.3	75.1022	41.3	352.285	12.6	0.815511	30	1.47	17.7	0.84	34.1	18.6	12.5	101	15	71	0.53	1
102	1	42	43	80	98	91.67	11.4	139	41.1	233	15.8	1.7	36.7	2.08	15.2	0.24	18.3	20	53.5	107.4	263	214.4	2	1
103	1	44	40.2	90	99	93.76	12.7	148	44.7	84	12.2	0.97	32.3	1.75	15.6	1.24	47.4	20.9	24.5	69.6	217.1	1000	1.07	1
104	1	44	40.6	62	98.6021	91.67	4.616	125	22.8	101	14	0.98	31.3	1.62	15.8	2.69	40	20.3	14.5	33	43	32.95	1.6	1
105	1	44	40.3	68	99	86	6.66	146	40.7	143	13	1.08	25	1.68	17.5	2.48	25.2	19.7	2.74	186.28	245	3332.54	5.01	1
106	2	45	40.3	70	100	72.67	16	133	44	236	11.9	1.05	27.2	2.75	12.9	0.14	23.9	28	2.89	74	110	29.7	0.643636	1
107	1	47	43	86	96	97.33	5.86	138	36	20.5511	14.1	1.06	62.376	2.47	18.2	0.14	31	51	16.9	85.1	213	342	2.30718	1
108	1	50	38.7	78	100	87.33	23.7952	132	43.4	198	12.7	0.86	28.8	1.42	17.6	0.19	16.9	39.4	15.3	58.1	180	833.897	0.7	1
109	1	50	38.5	66	79.466	79.33	10.7	162	36.7	183	11.5	1.17	31.2	3.6	16.2	0.28	282	56	17.3	114.2	187.7	119.2	2.3	1
110	1	56	40.5	85	100	82.67	11.09	154	34.1	191	11.7	2.0904	26.3	2.41	14.6	0.63	12	23	45.6	67	96	142.8	1.6	1
111	1	62	40.1	48	97	99.67	12.7	128	41.5	235	12.3	1.01	32.2	1.72	14.37	0.01	14	21	12.4	76.1	763.1	131.1	1.40829	1
112	1	65	43	46	95	97	8.49	149	47.7	247	11.9	1.16	33.9	1.82	23.852	0.04	85	201.4	53.7	66.4	59	278.22	1.2	1
113	1	65	41.3	80	99	77	12.27	122	42.5	208	14.5	1.24	30.1	2.4	14.8	0.287	22.5	15	4.62	82.2	91	27.56	0.9	1
114	1	65	41	69	99	92.33	10.8	147	39.5	183	22.39	1.44	23.5	2	14.5	0.02958	9.696	20	37	116.5	76	879.3	7.2	1
115	1	67	39.3	79	98	94.33	8.3	132	42.1	199	13.5	0.95	50.9	4.08	16.1	0.44	23.3	34.42	14.3	77.4	228.9	285	4.49332	1
116	1	75	40.5	86	100	94	13.6	117	37.9	168	12.88	1.26	31.7	3.04	19.2	0.21	13	23.9	19	2.1	7717	74.8	2.5	1
117	1	77	37.1	70	98	64.67	8.63	143	45	150	12	1.11	29	2.48	14.8	0.22	52	16.7	12.19	1.5	214.8	1200	2.1	1
118	1	88	40.5	60	98	65.33	8.58	161	38.6	202	13.5	0.815511	32.1	2	15.3	0.52	22	84	22.6	82	803	402.1	1.39282	1
119	1	18	38.3	80	98	83	19.3	134	46.1	157	10.7	1.07	24.2	2.83	13.9	0.34	33	14.5	20.6	122.25	21.2	109.2	1.29222	2
120	1	18	37.8	109	97	60.67	17.6	131	45.7	276	14.9	1.19	38.5	5.7	18.9	5.75	850	39	5.3	57	452.5	37.6	1.7544	2
121	1	19	38.1	127	95	87	10.83	138	43.4	259	11.6	1.07	28.4	2.28	16.6	0.1	56.4	4005.61	60.4	81	212	46	1.6	2
122	1	19	38.1	96	99	83.67	15.38	129	40.8	247	10.7	1.24	45.5	3.57	20.6	0.95	26	26	25.9	68	931	20	1.1	2
123	1	19	36.5	58	96	87	7.3	138	43.9	223	14.5	1.15	29.1	2.2	14.1	0.077	19.1	20	16.9	65	541	50	0.9	2
124	1	19	38.9	55	99	83.33	8.85	132	46.9	190	12.7	1.07	30.3	1.97	18	0.72	38	26	20.48	1.8	256	70.9	0.9	2
125	1	19	36.9	68	99	76.67	16.44	142	41.9	223	10.9	2.19	30.7	1.79	14.1	0.19	13	45	13.9	70.9	4018	28.1	1.1	2
126	1	19	36.6	70	98	90	12.53	148	41.7	298	13.1	1.41	24.4	3.32	17.4	0.334	15	31.72	13.3	73	495	23.51	4.1	2
127	1	19	37.8	88	97	90	15.2	147	39.9	201	16.4	1.18	22.8	1.3	18.8	0.635	14	11	3.88	4.6	1900.2	409	0.7	2
128	0	19	39.5	100	98	91	9.32	138	38.1	287	11.2	1.16	33.4	2.74	18.3	0.5	27	19.2	12.9	79.92	2675	25.8	1.21809	2
129	1	20	38	118	99	96.33	15.19	138	39.9	170	13.1	1.21	32.6	1.69	13.1	0.066	31.1	20.1	12.2	136.2	144	472	4.2	2
130	1	20	37.4	140	97	83.33	20.17	155	41.4	245	11.7	1.25	25.8	2.59	20.4	1.62	98	28	48.9	1.8	7154.98	37.1	1.3	2
131	1	20	37.8	83	98	75.67	5.1	127	42.8	276	12.3	0.94	32.1	1.92	18	0.136	708	40.7	2.57	88.76	146.4	904.1	1.32656	2
132	1	20	37.6	91	99	112.33	7.16	166	29	136	11.4	0.86	36	2.11	19.2	0.33	17.71	1672	11.5	114.69	228	538.6	1	2
133	1	20	38.8	127	100	90.67	14.32	151	44.5	352.285	13.7	1.13	28.6	2.28	17.8	0.48	37	24	43	120.8	144	107.5	0.6	2
134	1	20	37.8	154.602	96	154	8.13	145	40.2	102	12.4	1.25	38.5	2.03	15.2	2.93	25	38.5	11.1	124	401	1000	1.2	2
135	1	21	36.7	57	90	81.67	11.3	128	38.2	177	18	1.14	23.7	1.44	17.7	2.68	114.2	179	5.44	75.4	387	236.9	1.3	2
136	1	21	36.4	86	99	96.67	12.9	149	49	152	12.3	1.1	28.8	1.85	18	0.43	84	1547	53.8	66	344	827.75	3.9	2
137	1	21	37.7	100	99	92.67	8.9	138	36.1	390.9	14.7	1.11	29.5	1.46	24.2	0.34	665.2	18.03	14.3	3.4	178	978.26	3	2
138	1	21	38.3	76	96	73.33	3.8	132	49.2	216	14.4	1.18	30.2	2.14	14.8	0.192	39	30	24.3	87	452	139.67	3.1	2
139	1	21	37.8	77	94	79.67	15.16	135	38.3	181	12.9	1.07	26.7	2.32	18	2.29	1789	23	15.6	63	215	3000	8.8	2
140	1	21	38.5	77	99	79.33	11.95	157	39.6	159	18.2	1.02	30.1	2.25	15.3	0.18	29.2	50.9	8.3	91	146	183.2	2.7	2
141	1	21	40.8	80	100	90	18.36	138	41.5	242	12.8	1.07	25.6	2.86	18.8	1.25	24	21.4	10.15	8.8	190	503.8	1.7	2
142	1	21	38.5	76	98	112	9.8	139	36	181	11.7	1.1	33.4	1.58	18.2	0.187	196.2	34	14.1	119	1134	43.17	1.1	2
143	1	21	37.2	81	100	86.67	9.58	137	40	201	15.9	1.28	28.7	2.61	12.816	0.23	46	45.3	17.6	70	699.9	47.1	2.2	2
144	1	21	38.7	68	97.9184	64	10.64	131	39	139	13.9	1.87	31.4	1.59	24	0.05	43	830	33.3	130	709	367.4	1.1	2
145	1	21	42	120	97	86.67	17.43	152	39.4	205	12.9	0.85	29	2.16	16.1	0.05	83	42	31.5	136	1524	2108	1.52982	2
146	1	21	37	54	97	94	14.16	116	49.7	166	10.3	1.07	36.3	2.71	14.4	0.68	15	2430	12.2	132	575	27.34	0.81671	2
147	1	21	41	120	99.1146	78	9.13	129	45.1	292	13	1.11	23.6	2.16	15	0.062	24	19.4	31.5	77	2129	47.79	1.5	2
148	1	21	37.2	100	100	90	13.2	138	42.6	207	12.9	1.12	26.5	2.34	16.2	0.59	980	14	11.7	163	159	89.9	0.6	2
149	1	21	38.7	73	85	82.67	4.32	143	43.9	193	17	2.16	29.3	1.83	17.16	0.96	20.3	312.3	8.6	89.9	270	50	1.2089	2
150	1	22	40.6	100	100	89.67	25.089	149	45.3	156	11.7	1.76	39.5	2.28	14.9	1.85	145.9	21	6.1	126.9	68.6	205	0.35511	2
151	1	22	36	59	94	85	4.99	133	41.7	201	14.1	1.07	29.4	1.28	17.2	10.27	32.17	23	9.6	106	61	34	0.6	2
152	1	22	38.9	55	100	71.33	10.1	145	42.8	135	12.7	3.43	33.3	2.06	13.6	3.52	41	171	10.4	118	1191	195.5	2.2	2
153	1	22	37.7	75	99	83.33	7.74	143	47.1	67	13.1	1.07	25.7	2.4	15.3	29.44	75.7	18	19.7	100	134	900.6	0.5	2
154	1	22	39.5	99	100	72	12.91	141	44.3	266	24	1.09	38.1	2.4	18.3	0.08	29	16	4.85	98.68	41056	38	1.2	2
155	1	22	40.6	100	98	97.67	21.03	161	43.9	160	13.5	1.13745	38.4	2.6	23.6	0.14	63	865	5.7	112.5	149	11.5062	2.11449	2
156	1	22	38.5	108	99	89.67	5.4	157	38.3	197	13.4	1.26826	23.8	2.73	15	0.33	57	28.3	8.8	54	2926	87.14	0.66	2
157	1	22	38	109	98	81.67	21.03	145	41.3	176	12.8	0.93	42.1	2.65	20	0.32	34.88	69.2	12.4	101.9	213	21.28	0.9	2
158	1	22	37.5	130	99	81.67	6.7	147	41.9	145	13.6	1.34	25.2	2.5	16.7	0.42	32.1	50.3	43.4	74	322	385.2	4.3	2
159	1	22	38.6	62	98	83.67	7.98	152	37.7	186	12.8	1.09	31.8	2.91	19.2	0.09	31	26	10.9	64	145	12.2584	1.93	2
160	1	22	40	68	98	53.33	5.33	147	22.3511	264	12.8	1.08	28.9	5.62	18.48	0.42	4233	46	19.9	70	1021	2000	3	2
161	1	22	37.5	70	99	96	15.97	145	46.6	253	12.8	1.11	31.9	3.05	15	0.62	19	41	22.9	78	145	44.48	1.9	2
162	1	22	37.6	84	97	71	13.48	156	43.3	83	14.1	0.99	27.7	7.8	16.53	0.052	29	18.8	42.3	74.8	74	683.74	0.8	2
163	1	22	36.5	50	100	82.33	23.83	127	41.4	253	13.2	2.17	33.8	2.31	14.6	17.76	22	89.8	23	130	128	124	1	2
164	1	22	36.3	64	98	93.33	12.8	134	40	117	11.6	1.16	23.2	2.36	16.5	7.48	23	336	18.6	211.6	211	13.7	1.6	2
165	1	22	38.3	68	98	94.67	7.36	172	40.3	184	23.4	0.9	28.3	2.1	18.1	0.93	28.9	73	10.4	64	1836	163.2	0.81	2
166	1	23	36.6	75	99	125	9.1	158	45.6	207	15.8	1.08	25.9	2.15	19.7	0.17	15	2313	8.2	134	167	217.66	0.6	2
167	1	23	38.8	62	99	104.33	5.59	139	25.2	458	12.8	1.19	27.6	2.82	14.6	0.029	24	76	15.9	142	534	1007.98	2.5	2
168	1	23	36.3	70	100	110	7.84	123	43.9	186	14.1	1	34.4	2.61	23.4	0.25	21.5	750	9.6	113	242	90.5	2.3	2
169	1	23	37.8	53	98	76.67	23.7952	165	38.6	150	13.9	1.21	30.2	2.09	15.9	1.89	29	49.3	26	90.5	316	104.8	1.8	2
170	1	23	37.8	70	100	63.33	9.84	158	41.7	248	13	1.26	34.8	2.45	15.7	0.359	702	32	5.764	62	446.04	14206	1	2
171	1	23	37	96	98	106.33	8.95	137	41.2	199	15.9	1.14	34.4	3.4	17.4	19.01	27	25.6	10.2	68	174	58	2.2	2
172	1	23	40.6	98	98	89.67	11.46	131	42	211	13.1	1.05	32.5	2.8	19.9	4.06	26.8	74	23.4	0.5	461	75.28	3.21963	2
173	1	23	37.7	154.602	100	102.33	5	121	45.2	236	17.6	1.24	34.9	2.96	18.4	0.28	65	19	3.5	0.5	283.1	263.23	0.9	2
174	1	23	38.6	98	100	86.67	11.09	137	41.7	221	27.6	1.1	114.3	3.22	15.8	5.3	25.2	14	9.65	134.8	530	778	1.5	2
175	1	23	37.6	76	98	87	8.8	131	42.3	155	10.7	1.21	33.9	2.05	13.5	3.44	184.2	16	9.8	134	244	29	3.5	2
176	1	23	40.5	112	98	104.67	7.9	159	40.5	109	16.3	1.08	31.5	2.16	17.5	0.079	301	13.6	3.86	155	1034	44.64	1.95602	2
177	1	24	37.5	76	100	60	8.57	150	39.5	150	12.7	1.06	32.5	2.07	18.3	7.48	35	16.6	17.1	157	2592	52	1.8	2
178	1	24	37	80	96	85.67	12.04	147	49.3	244	14.4	1.08	32.1	1.94	17.5	1.55	4072	30	9.8	87.4	176	21	3.52842	2
179	1	24	40	130	99	76.33	11.78	147	47.3	258	13.3	1.54	29.14	1.5	14.5	0.45	26.2	12.9	3.35	68	360	343.66	2.64791	2
180	1	24	38.1	76	98	92.33	5.9	144	40.6	300	27.136	1	30.3	1.98	17.4	0.26	1596	18.3	20.9	101	119.3	21.08	1.5	2
181	1	24	38	81	95	75.33	14.48	154	40.4	117	12.1	1.16	29.17	1.7	15.3	2	74.9	41	10.2	93	201	343	1	2
182	1	24	38.4	108	99	76.33	9.9	135	40.4	81	12.6	1.32	26.4	1.73	13.9	0.14	10.6	16	11.6	86	438	29.28	2	2
183	1	25	37	64	100	90	18.5	134	45.7	196	14.84	1.0783	37.7	1.59	18.1	1.26	31	49	17.6	73	328	41.82	4	2
184	1	25	37.5	81	98	105.67	7.1	139	44	59	16.2	1.12	23.1	1.92	17.6	0.16	15.8	1679.9	26.56	62	479	266.3	1.20106	2
185	1	26	37.7	90	98	89.67	19.1	116	42.4	186	11.4	1.6	40.2	1.02	21	0.89	39.1	37	13.3	132.6	112	215	3.6	2
186	1	27	37.5	74	100	82.33	19.03	141	45	214	14.4	1.15	31.9	2.56	18.3	0.034	55	24	25.3	55	79.58	3386.95	5.9	2
187	0	27	43	130	99	85.33	5.83	139	41.6	257	12.7	0.98	31.7	2.26	17.3	1.09	34	34.3	8.4	140	576	33.8	1	2
188	1	28	36.2	125	99	64	23.77	140	46.5	221	12.8	1.42	21.5	1.78	18.5	0.48	67	25	10.9	77.5	214	242	0.79	2
189	1	29	39	77	97	88.33	16	120	50	216	38	1.22	24.4	2.43	16.4	0.112	864.3	36	22.2	107	184	26.88	0.6	2
190	1	31	37.8	107	99	82	15.96	147	38.6	122	13.5	1.09	27.4	2.01	16.2	0.29	121	26	9.78	85.9	221	265.057	6.7	2
191	1	32	37.9	84	99	78.33	14.95	140	40	62	14	0.89	59.4	2.03	17.4	0.05	25	14	19.7	200.4	1176	171	1.7	2
192	1	51	38.8	101	98	100	9.62	158	50.7	202	15.2	1.14	47.15	2.8	16.6	4.86	60.5	35.4	15.4	110	398	768	1.1	2
193	1	58	38.5	95	98	101	9.45	156	39.3	101	12.9	1.12	25.5	2.4	18.4	0.731	40	30	16.8	1.7	1277.4	422	0.9	2
194	1	64	40.5	146.36	100	87.67	10.7	157	39	202	13.1	1.51	29.63	1.17	18.1	0.95	30	1176	27.8	288.5	275	16.4	0.5	2
195	1	67	41.2	86	99	82	11.8	148	38.8	182	11.4	1.15	27.4	2.31	19.9	3.05	41	18	3.93	105	206	479.8	1.4	2
196	1	72	38.8	54	98	84.67	8.79	138	42.5	63.06	11.7	1.27	31.8	2.33	15.9	0.12	53	26	124.4	131	5125	34.96	1.27338	2
197	2	82	43	62	98.159	78.33	7.38	154	42	196	14.5	1.18	53.4	1.47	17.2	0.62	30.5	25	21.5	114.2	530.9	565.1	1.7	2
198	2	84	35	80	99	84	6	154	46.6	175	11.4	1.13	36.7	1.81	15.9	0.77	41	26.8	34.4	113	2145.8	172.4	2.14432	2
